# Supplementary material for: Fecal 1H-NMR Metabolomics: A Comparison of Sample Preparation Methods for NMR and Novel in Silico Baseline Correction
Source: MDPI journal article supplement (doi:10.3390/metabo12020148), 2022-02-05
Supplement: s1 [file s1]

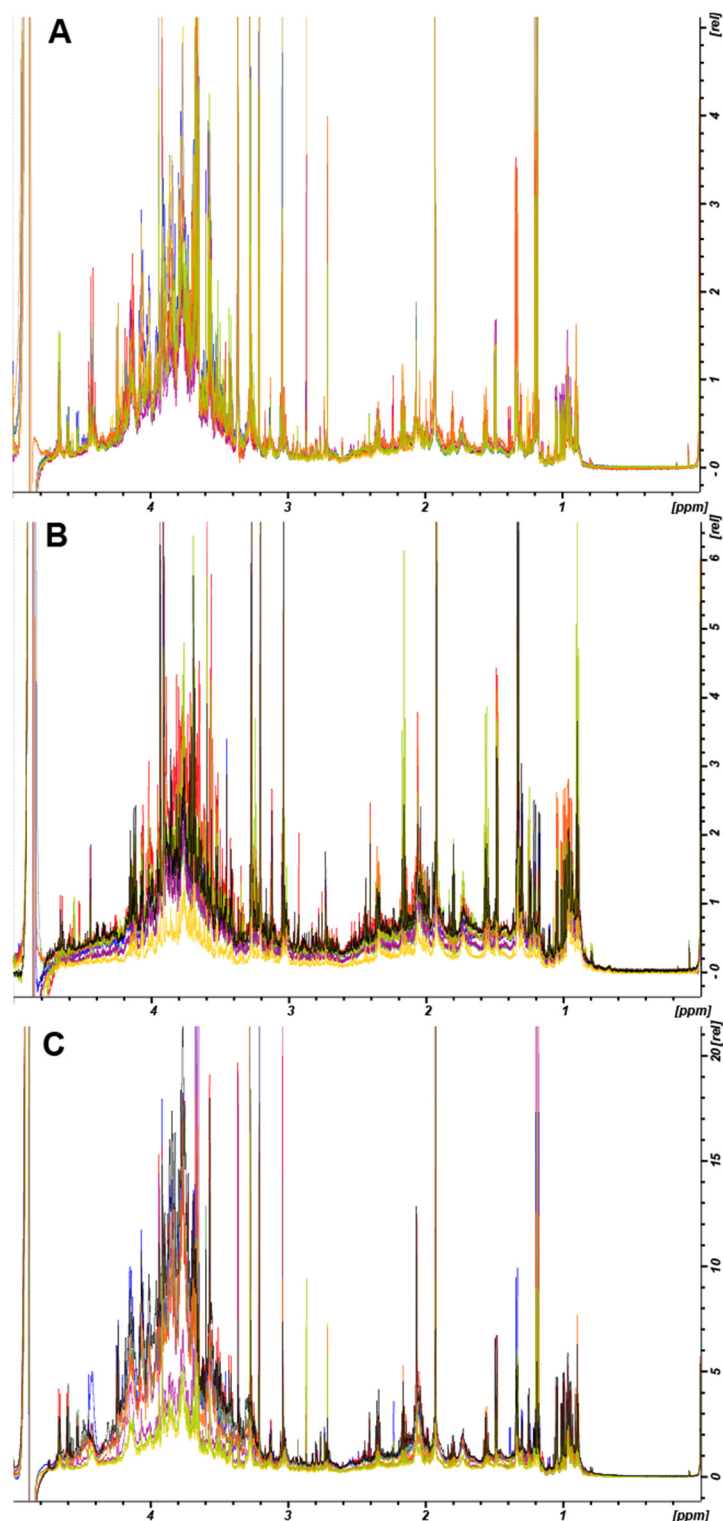

**Figure S1.** Overlaid NMR spectra of water-soluble metabolites in the 1-5 ppm region of chicken feces samples that were divided in three equivalent aliquots and were processed by (A) ultrafiltration, (B) Bligh-Dyer extraction, and (C) no extraction. The fanning of the spectra baseline indicates variability between the methods, as the metabolome differences for each complete set of samples are identical. The spectra have been split at the water peak, and the vertical scale has been increased to better illustrate spectral fanning.

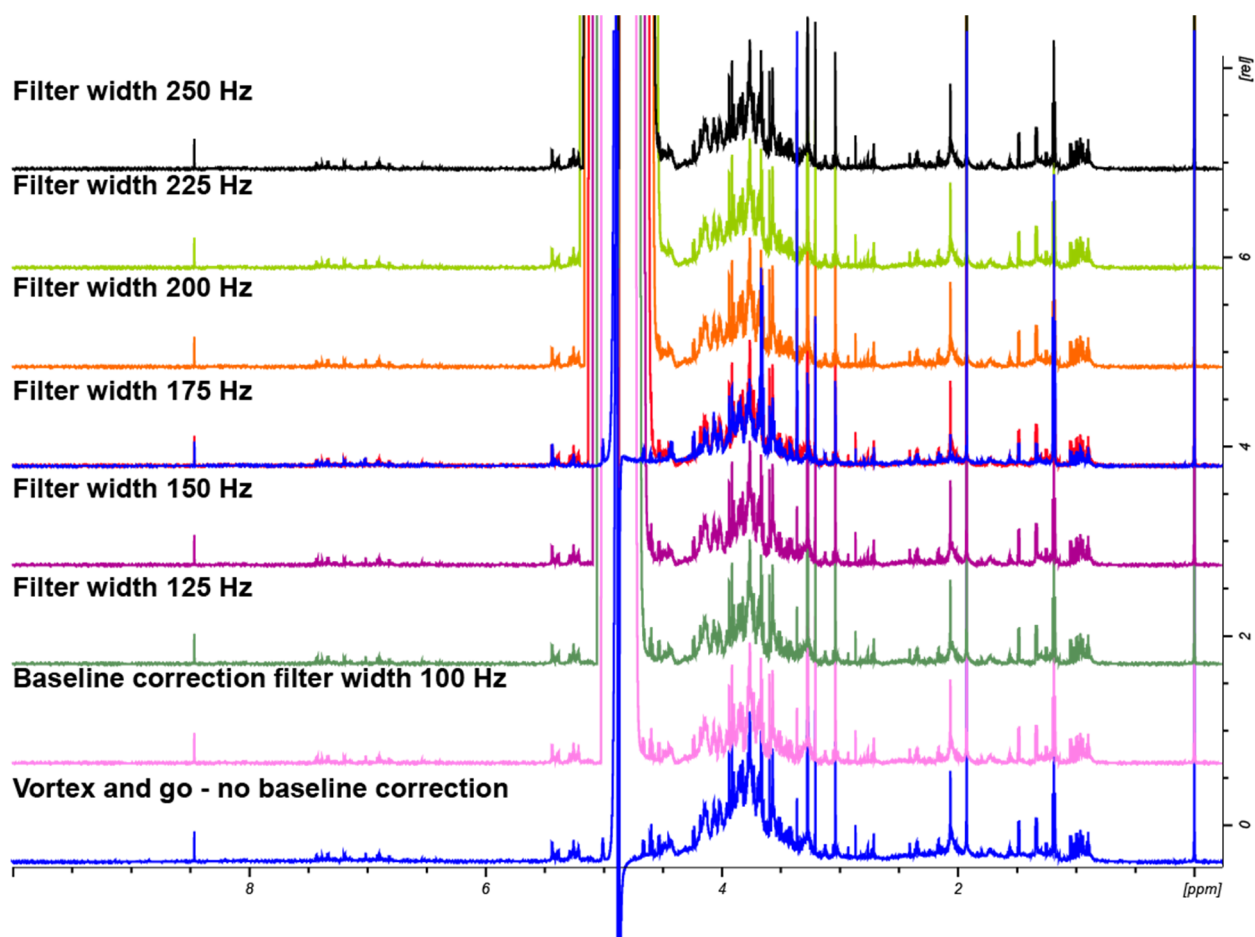

**Figure S2.** The effect of different *in silico* baseline correction filter widths on a representative rat fecal spectrum. A filter width of 175 Hz was chosen as it most closely resembled the spectrum produced by ultrafiltration and is shown in blue superimposed on top of the spectrum obtained using a filter width of 175 Hz.

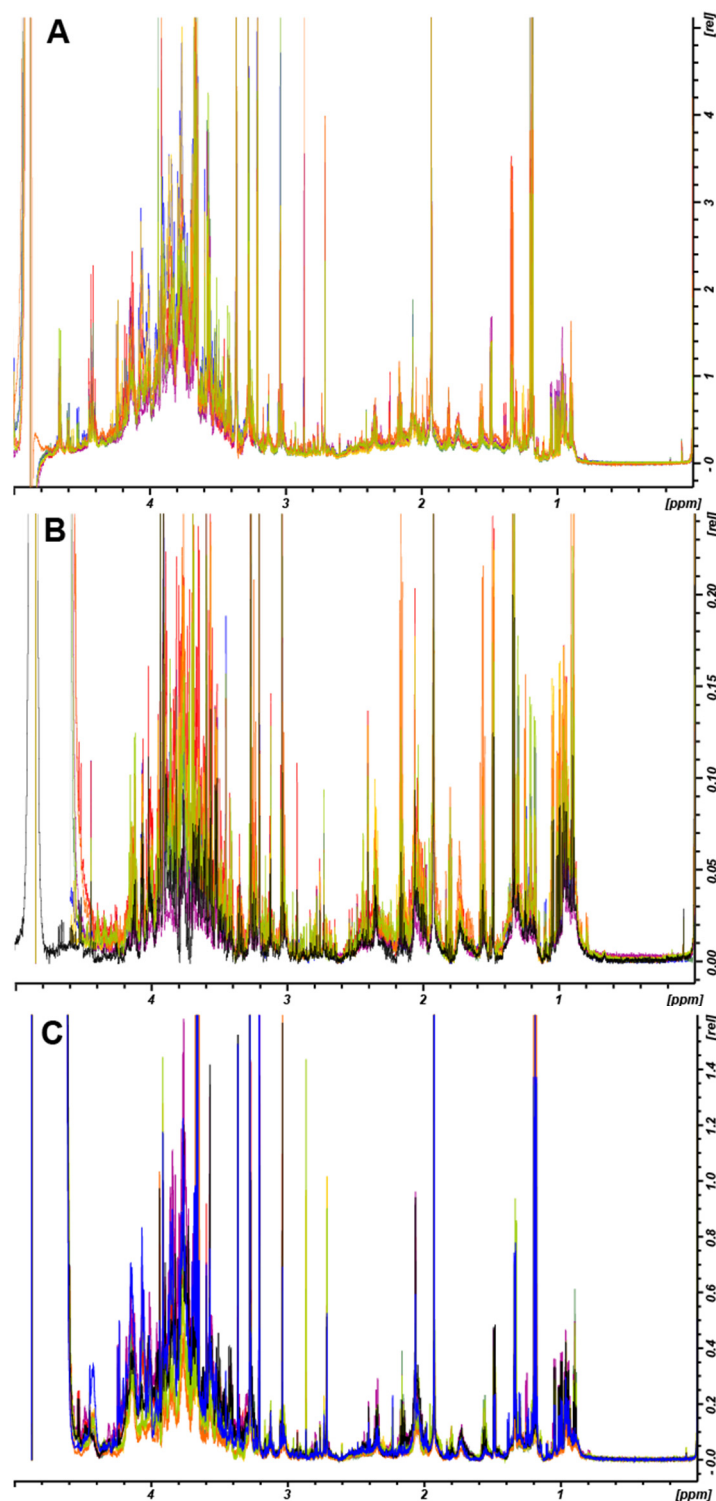

**Figure S3.** Comparison of NMR water-soluble metabolite spectra in the 1-5 ppm range of chicken feces samples that were divided into three equivalent aliquots and processed by (A) ultrafiltration, (B) Bligh-Dyer extraction, and (C) no extraction. In the case of B and C, the spectra were processed after data collection using *in silico* baseline correction with a filter width of 175 Hz. The baseline correction has removed or greatly reduced the distortions observed for the same samples prior to baseline correction.

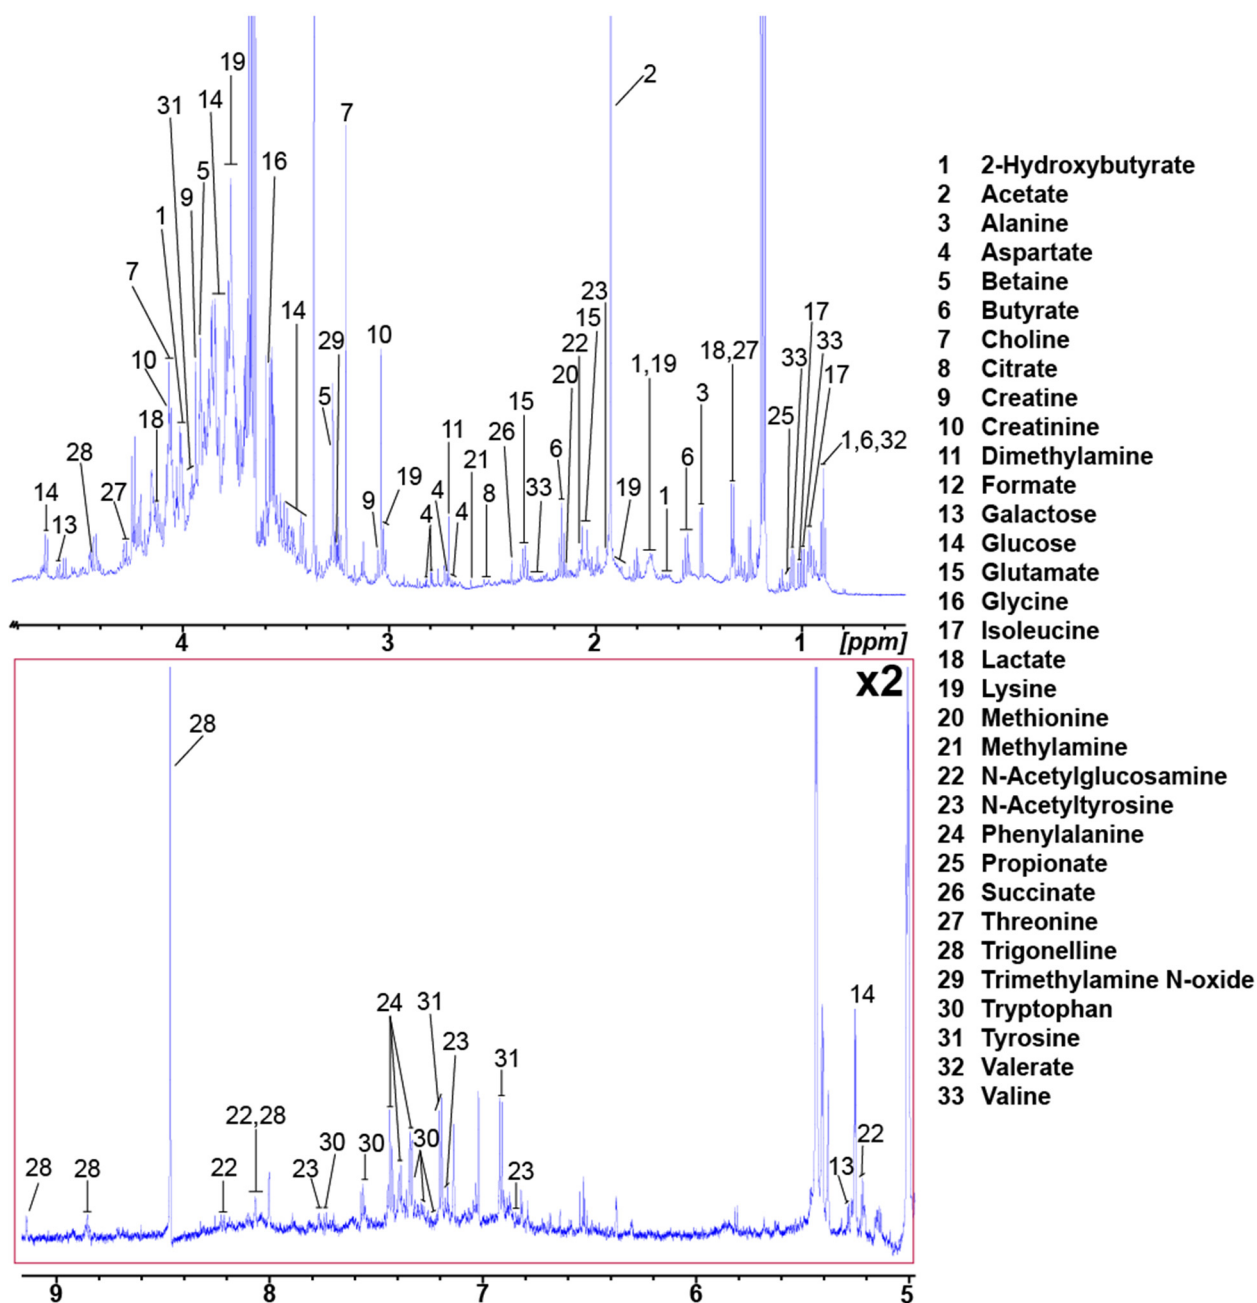

**Figure S4.** Average water-soluble chicken fecal metabolome. Metabolite concentrations are listed in Supplemental Table S3.

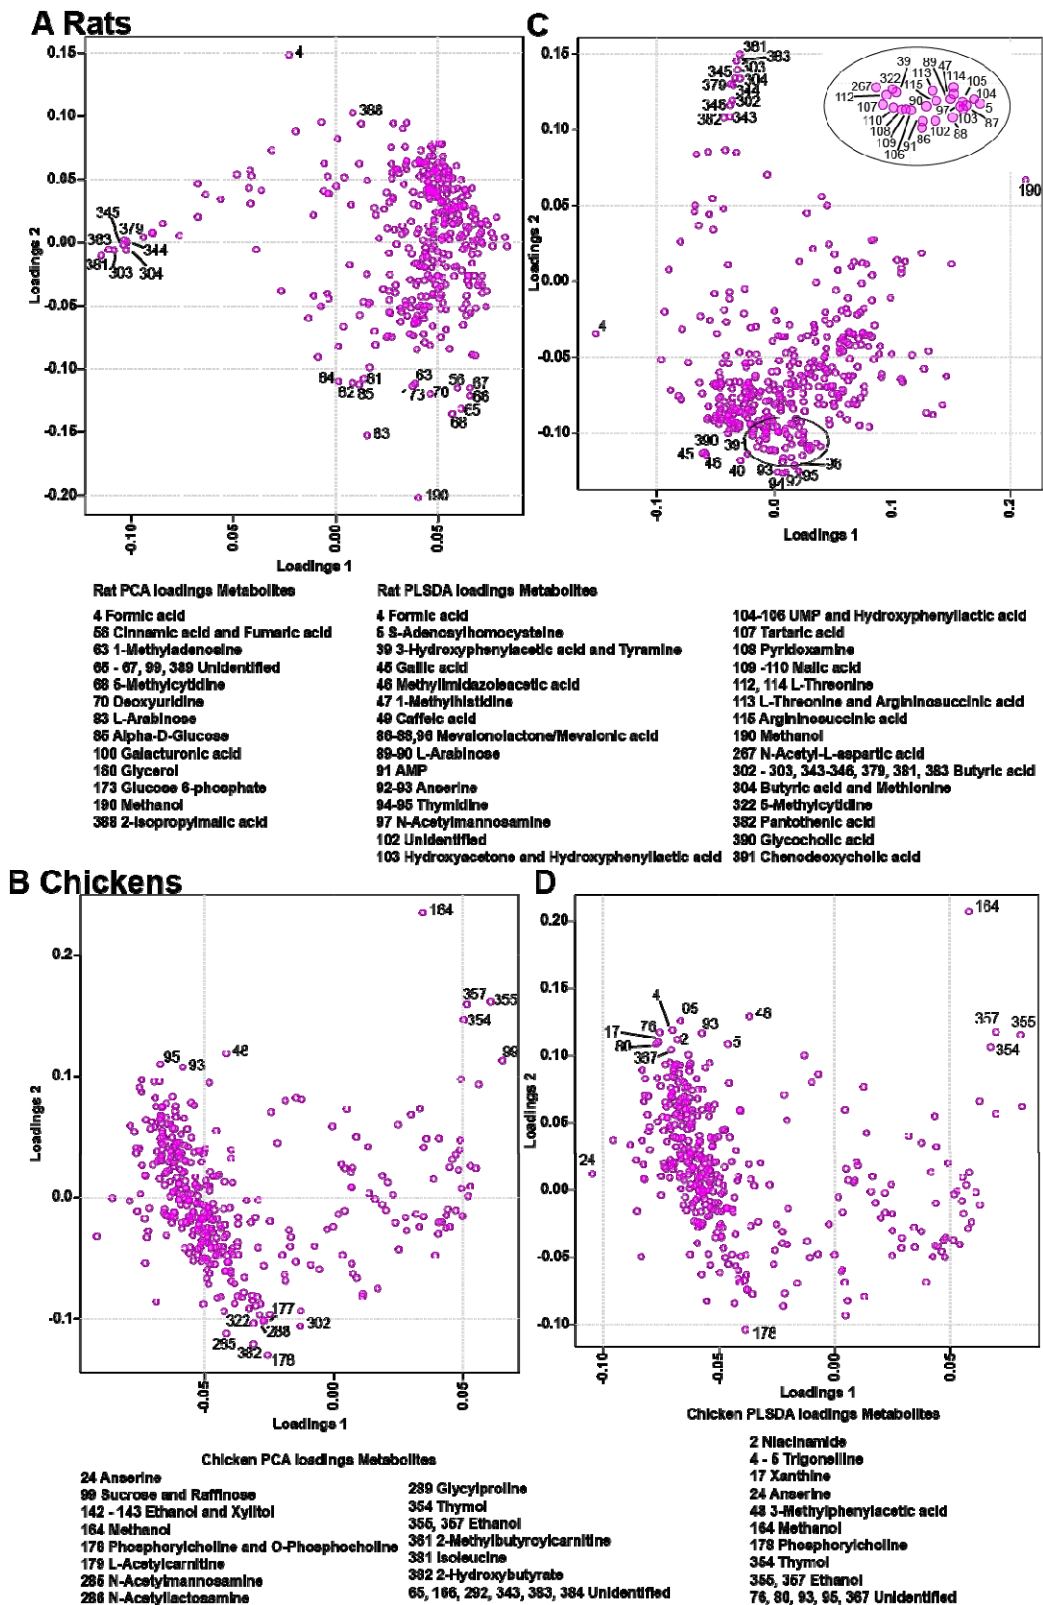

**Figure S5.** Principle component analysis (A, B) and partial least squares discriminate analysis (C, D) loadings plots for rats (A, C) and chickens (B, D). Numbers refer to the bins with loading values greater than 0.1 or less than -0.1.

**Table S1.** Average (av.) concentrations in millimolar (mM) of all metabolites identified in rat feces that were processed by ultrafiltration (UF), no extraction(No Extract.), Bligh-Dyer (BD) extraction, no extraction followed by baseline correction (No Extract. BC), and BD followed by baseline correction (BD BC). Metabolites were identified and quantified using Chemomx. The numbers presented in brackets correspond to the standard deviation (STD) and percent occurrence (% occur.) of each metabolite, respectively. The multiplicity listed corresponds to the chemical shifts provided for each metabolite, respectively.

| Compound Name            | Chemical Shift (ppm)                        | Multiplicity                                                                              | No Extract.                  | BD                           | UF                           | No Extract. BC               | BD BC av               |
|--------------------------|---------------------------------------------|-------------------------------------------------------------------------------------------|------------------------------|------------------------------|------------------------------|------------------------------|------------------------|
|                          |                                             |                                                                                           | av mM<br>(STD / %<br>occur.) | mM (STD<br>/ % occur.) |
| Sebacic acid             | 2.2, 1.5, 1.3                               | Triplet, Multiplet, Doublet                                                               | 0.083 (0.038 / 100)          | 0.039 (0.011 / 90)           | 0.080 (0.033 / 100)          | 0.071 (0.034 / 80)           | 0.036 (0.014 / 80)     |
| Nervonic acid            | 5.4, 2.4, 2.0, 1.6, 1.3, 1.3, 0.9           | Triplet, Triplet, Quartet, Multiplet, Multiplet, Multiplet, Triplet                       | 2.741 (0.885 / 100)          | 0.713 (0.025 / 20)           | 1.681 (0.391 / 70)           | 2.906 (0.558 / 100)          | 1.386 (0.565 / 90)     |
| 5-Hydroxy-L-tryptophan   | 7.4, 7.3, 7.1, 6.8, 4.0, 3.4, 3.4, 3.2      | Doublet, Singlet, Doublet, Quartet, Quartet, Doublet, Doublet, Quartet                    | 0.163 (0.088 / 60)           | 0.042 (0.018 / 80)           | 0.083 (0.034 / 100)          | 0.044 (0.027 / 40)           | 0.032 (0.008 / 70)     |
| Methyl isobutyl ketone   | 2.4, 2.2, 2.1, 0.9                          | Doublet, Singlet, Multiplet, Doublet                                                      | 1.837 (0.645 / 80)           | 0.445 (0.117 / 70)           | 1.171 (0.639 / 100)          | 0.926 (0.449 / 100)          | 0.350 (0.139 / 50)     |
| Erythrose                | 5.3, 4.4, 4.2, 4.0, 3.8                     | Doublet, Doublet, Quartet, Triplet, Multiplet                                             | 5.015 (2.183 / 40)           | 0.539 (0.179 / 20)           | 2.611 (1.437 / 40)           | 2.772 (0.000 / 20)           | 1.051 (0.330 / 30)     |
| p-Cresol                 | 7.2, 6.8, 2.2                               | Doublet, Doublet, Singlet                                                                 | 0.086 (0.005 / 40)           | 0.015 (0.008 / 40)           | 0.054 (0.013 / 60)           | 0.041 (0.008 / 80)           | 0.012 (0.001 / 20)     |
| Urocanic acid            | 7.9, 7.4, 7.3, 6.4                          | Singlet, Singlet, Doublet, Doublet                                                        | 0.071 (0.034 / 100)          | 0.019 (0.005 / 70)           | 0.049 (0.020 / 90)           | 0.026 (0.013 / 60)           | 0.012 (0.003 / 60)     |
| m-Coumaric acid          | 7.3, 7.2, 7.1, 6.9, 6.5, 6.5                | Multiplet, Doublet, Triplet, Quartet, Singlet, Singlet                                    | 0.041 (0.014 / 40)           | 0.015 (0.003 / 70)           | 0.035 (0.009 / 60)           | 0.014 (0.002 / 40)           | 0.012 (0.004 / 80)     |
| Acetoin                  | 4.4, 2.2, 1.4                               | Doublet, Singlet, Doublet                                                                 | 0.169 (0.036 / 60)           | 0.040 (0.006 / 40)           | 0.183 (0.053 / 30)           | 0.158 (0.046 / 60)           | 0.042 (0.006 / 30)     |
| Acetylglycine            | 8.0, 3.8, 2.0                               | Singlet, Doublet, Singlet                                                                 | 2.634 (0.642 / 100)          | 0.777 (0.276 / 100)          | 1.661 (0.542 / 100)          | 0.876 (0.517 / 40)           | 0.543 (0.173 / 90)     |
| Homovanillic acid        | 6.9, 6.9, 6.8, 3.9, 3.4                     | Doublet, Doublet, Quartet, Singlet, Singlet                                               | 0.067 (0.038 / 60)           | 0.013 (0.006 / 80)           | 0.028 (0.021 / 40)           | 0.034 (0.011 / 80)           | 0.012 (0.004 / 100)    |
| Sucrose                  | 5.4, 4.2, 4.0, 3.8, 3.8, 3.7, 3.6, 3.5      | Doublet, Doublet, Triplet, Multiplet, Triplet, Singlet, Quartet, Triplet                  | 0.027 (0.032 / 60)           | 0.010 (0.005 / 30)           | 0.041 (0.014 / 90)           | 0.030 (0.037 / 80)           | 0.028 (0.013 / 90)     |
| Deoxycytidine            | 7.8, 6.3, 5.9, 4.5, 4.0, 3.8, 3.7, 3.6, 2.4 | Doublet, Triplet, Doublet, Multiplet, Multiplet, Quartet, Multiplet, Multiplet, Multiplet | 0.016 (0.000 / 20)           | 0.012 (0.002 / 70)           | 0.018 (0.006 / 80)           | 0.015 (0.000 / 20)           | 0.013 (0.002 / 40)     |
| Valine                   | 3.6, 2.3, 1.0, 1.0                          | Doublet, Multiplet, Doublet, Doublet                                                      | 0.101 (0.034 / 80)           | 0.033 (0.012 / 100)          | 0.138 (0.061 / 90)           | 0.066 (0.031 / 100)          | 0.031 (0.012 / 100)    |
| Leucine                  | 3.7, 1.7, 1.0                               | Multiplet, Multiplet, Triplet                                                             | 0.249 (0.126 / 40)           | 0.062 (0.000 / 10)           | 0.096 (0.025 / 90)           | 0.123 (0.023 / 60)           | 0.041 (0.000 / 10)     |
| N-Acetyl-L-methionine    | 8.2, 4.4, 2.6, 2.1, 2.0                     | Doublet, Multiplet, Multiplet, Singlet, Singlet                                           | 0.045 (0.019 / 100)          | 0.013 (0.006 / 70)           | 0.035 (0.006 / 60)           | 0.033 (0.005 / 100)          | 0.029 (0.058 / 100)    |
| N-Acetyl-L-aspartic acid | 7.9, 4.4, 2.7, 2.7, 2.5, 2.5, 2.5, 2.0      | Doublet, Multiplet, Doublet, Doublet, Singlet, Doublet, Singlet, Singlet                  | 0.230 (0.169 / 60)           | 0.119 (0.021 / 20)           | 0.179 (0.107 / 30)           | 0.120 (0.088 / 100)          | 0.202 (0.461 / 100)    |
| 4,5-Dihydroorotic acid   | 4.1, 3.0, 2.9, 2.8, 2.8                     | Triplet, Doublet, Doublet, Doublet, Doublet                                               | 0.028 (0.015 / 40)           | 0.062 (0.000 / 10)           | 0.154 (0.149 / 30)           | 0.059 (0.035 / 40)           | 0.022 (0.012 / 20)     |
| Thymine                  | 7.4, 1.9                                    | Doublet, Doublet                                                                          | 0.050 (0.000 / 20)           | 0.028 (0.010 / 100)          | 0.075 (0.013 / 60)           | 0.071 (0.032 / 60)           | 0.019 (0.005 / 90)     |
| Phenylacetic acid        | 7.4, 7.3, 3.5                               | Triplet, Triplet, Singlet                                                                 | 0.148 (0.051 / 60)           | 0.036 (0.012 / 80)           | 0.101 (0.019 / 80)           | 0.063 (0.014 / 60)           | 0.032 (0.008 / 90)     |
| Propionic acid           | 2.2, 1.0                                    | Quartet, Triplet                                                                          | 2.931 (0.807 / 100)          | 1.005 (0.177 / 100)          | 1.793 (0.436 / 100)          | 2.917 (0.776 / 100)          | 1.039 (0.159 / 90)     |
| 1,3-Dimethyluric acid    | 3.4, 3.3                                    | Singlet, Singlet                                                                          | 0.045 (0.011 / 100)          | 0.009 (0.004 / 80)           | 0.022 (0.009 / 100)          | 0.007 (0.005 / 100)          | 0.002 (0.001 / 80)     |

|                                        |                                                                           |                                                                                                                                           |                      |                     |                     |                      |                     |
|----------------------------------------|---------------------------------------------------------------------------|-------------------------------------------------------------------------------------------------------------------------------------------|----------------------|---------------------|---------------------|----------------------|---------------------|
| <b>Undecanedioic acid</b>              | 2.2, 1.5, 1.3                                                             | Triplet, Triplet, Singlet                                                                                                                 | 0.061 (0.031 / 100)  | 0.028 (0.009 / 100) | 0.055 (0.023 / 100) | 0.053 (0.036 / 100)  | 0.020 (0.014 / 80)  |
| <b>Phenylalanine</b>                   | 7.4, 7.4, 7.3, 4.0, 3.3, 3.1                                              | Triplet, Multiplet, Doublet, Quartet, Quartet, Quartet                                                                                    | 0.169 (0.116 / 100)  | 0.030 (0.009 / 70)  | 0.113 (0.046 / 100) | 0.122 (0.056 / 100)  | 0.033 (0.008 / 70)  |
| <b>p-Hydroxyphenylacetic acid</b>      | 7.2, 6.9, 3.4                                                             | Doublet, Doublet, Singlet                                                                                                                 | 0.071 (0.016 / 40)   | 0.014 (0.007 / 90)  | 0.035 (0.011 / 60)  | 0.024 (0.012 / 80)   | 0.020 (0.012 / 80)  |
| <b>Acetic acid</b>                     | 1.9                                                                       | Singlet                                                                                                                                   | 13.393 (3.368 / 100) | 4.602 (0.774 / 100) | 8.367 (1.864 / 100) | 13.386 (3.378 / 100) | 4.652 (0.798 / 90)  |
| <b>3,4-Dihydroxybenzeneacetic acid</b> | 6.9, 6.8, 6.7, 3.4                                                        | Doublet, Doublet, Quartet, Singlet                                                                                                        | 0.025 (0.007 / 60)   | 0.034 (0.013 / 30)  | 0.088 (0.035 / 70)  | 0.039 (0.020 / 100)  | 0.033 (0.014 / 60)  |
| <b>Ethanol</b>                         | 3.6, 1.2                                                                  | Quartet, Triplet                                                                                                                          | 0.521 (0.445 / 60)   | 0.194 (0.100 / 90)  | 0.565 (0.306 / 100) | 0.428 (0.415 / 80)   | 0.189 (0.094 / 90)  |
| <b>Pyridoxal</b>                       | 7.6, 6.6, 5.3, 5.2, 5.1, 2.5                                              | Singlet, Doublet, Singlet, Singlet, Doublet, Singlet                                                                                      | 0.022 (0.010 / 40)   | 0.003 (0.003 / 80)  | 0.015 (0.002 / 20)  | 0.002 (0.000 / 20)   | 0.002 (0.000 / 80)  |
| <b>Histamine</b>                       | 7.8, 7.1, 3.3, 3.0                                                        | Singlet, Singlet, Triplet, Triplet                                                                                                        | 0.052 (0.000 / 20)   | 0.006 (0.000 / 10)  | 0.022 (0.000 / 10)  | 0.015 (0.003 / 100)  | 0.011 (0.002 / 30)  |
| <b>Indoxyl sulfate</b>                 | 7.7, 7.5, 7.4, 7.3, 7.2                                                   | Doublet, Doublet, Singlet, Triplet, Triplet                                                                                               | 1.226 (0.465 / 100)  | 0.400 (0.144 / 80)  | 0.676 (0.240 / 100) | 0.261 (0.000 / 20)   | 0.231 (0.062 / 90)  |
| <b>3-Cresotinic acid</b>               | 7.7, 7.3, 6.9, 2.2                                                        | Quartet, Doublet, Triplet, Singlet                                                                                                        | 0.204 (0.078 / 100)  | 0.113 (0.058 / 70)  | 0.108 (0.016 / 40)  | 0.116 (0.005 / 40)   | 0.093 (0.037 / 80)  |
| <b>Glutamic acid</b>                   | 3.7, 2.3, 2.1                                                             | Quartet, Multiplet, Multiplet                                                                                                             | 0.521 (0.220 / 80)   | 0.169 (0.050 / 70)  | 0.347 (0.073 / 30)  | 0.307 (0.042 / 40)   | 0.098 (0.025 / 30)  |
| <b>Uracil</b>                          | 7.5, 5.8                                                                  | Doublet, Doublet                                                                                                                          | 0.226 (0.000 / 20)   | 0.248 (0.058 / 100) | 0.470 (0.205 / 90)  | 0.212 (0.057 / 60)   | 0.243 (0.066 / 100) |
| <b>Methylimidazoleacetic acid</b>      | 7.9, 7.0, 3.7, 3.5                                                        | Singlet, Singlet, Singlet, Singlet                                                                                                        | 0.830 (0.411 / 100)  | 0.200 (0.109 / 100) | 0.350 (0.180 / 100) | 0.096 (0.047 / 100)  | 0.126 (0.070 / 90)  |
| <b>Xylulose</b>                        | 4.4, 4.2, 4.0, 3.6, 3.6, 3.6, 3.6                                         | Quartet, Quartet, Doublet, Multiplet, Singlet, Singlet, Singlet                                                                           | 7.018 (5.220 / 100)  | 2.447 (0.778 / 20)  | 7.173 (4.898 / 100) | 5.505 (3.016 / 100)  | 2.520 (1.140 / 60)  |
| <b>Betaine</b>                         | 3.9, 3.3                                                                  | Singlet, Singlet                                                                                                                          | 0.134 (0.066 / 40)   | 0.049 (0.015 / 20)  | 0.132 (0.049 / 60)  | 0.051 (0.015 / 100)  | 0.017 (0.009 / 80)  |
| <b>Galacturonic acid</b>               | 5.3, 4.6, 4.4, 4.3, 4.2, 4.1, 3.9, 3.8, 3.7, 3.5                          | Doublet, Doublet, Doublet, Quartet, Quartet, Doublet, Quartet, Quartet, Quartet, Quartet                                                  | 1.177 (0.284 / 100)  | 0.167 (0.057 / 100) | 1.000 (0.251 / 100) | 1.372 (0.286 / 100)  | 0.300 (0.043 / 90)  |
| <b>Galactose</b>                       | 5.3, 4.1, 4.0, 3.9, 3.8, 3.7, 3.6, 3.5                                    | Doublet, Triplet, Doublet, Doublet, Quartet, Multiplet, Quartet, Quartet                                                                  | 0.140 (0.037 / 40)   | 0.023 (0.016 / 50)  | 0.105 (0.014 / 60)  | 0.226 (0.061 / 100)  | 0.151 (0.000 / 10)  |
| <b>Maltose</b>                         | 5.4, 5.2, 3.9, 3.8, 3.7, 3.4, 3.4, 3.3                                    | Doublet, Doublet, Multiplet, Multiplet, Multiplet, Doublet, Singlet, Quartet                                                              | 0.186 (0.147 / 60)   | 0.050 (0.035 / 50)  | 0.085 (0.061 / 80)  | 0.188 (0.171 / 40)   | 0.079 (0.028 / 70)  |
| <b>Phenol</b>                          | 7.3, 7.0                                                                  | Triplet, Singlet                                                                                                                          | 0.034 (0.000 / 20)   | 0.088 (0.030 / 90)  | 0.092 (0.016 / 30)  | 0.109 (0.050 / 100)  | 0.077 (0.020 / 100) |
| <b>5-Thymidylic acid</b>               | 7.8, 6.3, 4.2, 4.1, 2.4, 1.9                                              | Doublet, Triplet, Multiplet, Multiplet, Multiplet, Doublet                                                                                | 0.083 (0.000 / 20)   | 0.020 (0.005 / 80)  | 0.067 (0.013 / 70)  | 0.033 (0.007 / 80)   | 0.021 (0.007 / 90)  |
| <b>Allantoin</b>                       | 6.0, 5.4                                                                  | Singlet, Singlet                                                                                                                          | 0.037 (0.015 / 80)   | 0.011 (0.004 / 60)  | 0.034 (0.011 / 100) | 0.047 (0.012 / 100)  | 0.038 (0.013 / 60)  |
| <b>Serotonin</b>                       | 7.4, 7.3, 7.1, 6.9, 3.3, 3.1                                              | Doublet, Singlet, Doublet, Quartet, Triplet, Triplet                                                                                      | 0.026 (0.000 / 20)   | 0.031 (0.013 / 90)  | 0.054 (0.022 / 70)  | 0.015 (0.006 / 60)   | 0.018 (0.008 / 80)  |
| <b>Aspartic acid</b>                   | 3.9, 2.8, 2.8, 2.7                                                        | Quartet, Doublet, Doublet, Quartet                                                                                                        | 0.211 (0.094 / 80)   | - (- / 100)         | 0.152 (0.081 / 100) | 0.115 (0.034 / 100)  | 0.020 (0.011 / 80)  |
| <b>N-Acetylneuraminic acid</b>         | 4.0, 4.0, 4.0, 3.9, 3.9, 3.8, 3.8, 3.6, 3.5, 2.2, 2.1, 1.9, 1.8, 1.8, 1.8 | Multiplet, Singlet, Singlet, Triplet, Doublet, Quartet, Multiplet, Quartet, Doublet, Quartet, Singlet, Singlet, Singlet, Singlet, Singlet | 1.233 (0.268 / 100)  | 0.333 (0.106 / 100) | 0.887 (0.210 / 100) | 0.208 (0.188 / 100)  | 0.112 (0.059 / 100) |
| <b>FAD</b>                             | 8.3, 7.9, 7.6, 7.6, 5.8, 4.5, 4.5, 4.3, 4.1,                              | Singlet, Singlet, Singlet, Singlet, Doublet, Triplet, Triplet, Multiplet, Singlet,                                                        | 1.918 (0.959 / 100)  | 0.409 (0.214 / 90)  | 1.082 (0.514 / 90)  | 0.180 (0.000 / 20)   | 0.284 (0.057 / 90)  |

|                              |                                                       |                                                                                                             |       |               |       |               |       |               |       |               |       |               |
|------------------------------|-------------------------------------------------------|-------------------------------------------------------------------------------------------------------------|-------|---------------|-------|---------------|-------|---------------|-------|---------------|-------|---------------|
| Xylose                       | 4.1, 3.9, 2.4, 2.3                                    | Multiplet, Quartet, Singlet, Singlet                                                                        |       |               |       |               |       |               |       |               |       |               |
|                              | 5.2, 4.6, 3.9, 3.6, 3.5, 3.4,                         | Doublet, Doublet, Quartet, Multiplet, Quartet, Triplet,                                                     | 0.121 | (0.024 / 40)  | 0.036 | (0.013 / 30)  | 0.081 | (0.026 / 60)  | 0.082 | (0.048 / 100) | 0.018 | (0.005 / 70)  |
|                              | 3.3, 3.3, 3.3, 3.2                                    | Singlet, Singlet, Singlet, Quartet                                                                          |       |               |       |               |       |               |       |               |       |               |
|                              | 7.4, 7.2, 7.0, 6.8, 3.6                               | Doublet, Singlet, Doublet, Quartet, Singlet                                                                 | 0.094 | (0.040 / 60)  | 0.015 | (0.010 / 80)  | 0.046 | (0.017 / 90)  | 0.014 | (0.001 / 80)  | 0.010 | (0.008 / 90)  |
| Thiamine                     | 9.5, 8.0, 5.5, 3.9, 3.2, 2.6, 2.5                     | Singlet, Singlet, Singlet, Triplet, Triplet, Singlet, Singlet                                               | 0.028 | (0.017 / 60)  | 0.004 | (0.003 / 70)  | 0.011 | (0.005 / 70)  | 0.004 | (0.002 / 60)  | 0.003 | (0.001 / 60)  |
| Raffinose                    | 5.4, 4.2, 4.0, 4.0, 3.9, 3.9, 3.8, 3.8, 3.7,          | Doublet, Doublet, Multiplet, Doublet, Triplet, Multiplet, Multiplet, Multi-                                 | 0.634 | (0.122 / 60)  | 0.121 | (0.055 / 80)  | 0.239 | (0.262 / 70)  | 0.378 | (0.231 / 80)  | 0.285 | (0.211 / 90)  |
|                              | 3.7, 3.6, 3.5, 3.5                                    | plet, Singlet, Doublet, Quartet, Singlet, Singlet                                                           |       |               |       |               |       |               |       |               |       |               |
| Histidine                    | 7.9, 7.1, 4.0, 3.3, 3.2, 3.2                          | Doublet, Singlet, Quartet, Doublet, Doublet, Quartet                                                        | 0.111 | (0.028 / 40)  | 0.027 | (0.009 / 80)  | 0.077 | (0.005 / 30)  | 0.013 | (0.002 / 40)  | 0.016 | (0.008 / 40)  |
| Malic acid                   | 4.3, 2.7, 2.6, 2.4, 2.4, 2.3                          | Quartet, Doublet, Doublet, Singlet, Doublet, Singlet                                                        | 0.726 | (0.233 / 100) | 0.132 | (0.078 / 100) | 0.413 | (0.166 / 100) | 0.215 | (0.160 / 100) | 0.442 | (1.226 / 100) |
| Homoveratric acid            | 7.0, 7.0, 6.9, 3.8, 3.5                               | Doublet, Doublet, Quartet, Doublet, Singlet                                                                 | 0.158 | (0.051 / 100) | 0.026 | (0.014 / 50)  | 0.086 | (0.013 / 80)  | 0.022 | (0.001 / 40)  | 0.131 | (0.313 / 100) |
| 7-Methylxanthine             | 7.8, 3.9                                              | Singlet, Singlet                                                                                            | 0.747 | (0.137 / 60)  | 0.236 | (0.078 / 90)  | 1.155 | (0.971 / 90)  | 0.760 | (0.765 / 100) | 0.227 | (0.115 / 90)  |
| Glycerophosphocholine        | 4.3, 3.9, 3.7, 3.6, 3.2                               | Multiplet, Multiplet, Multiplet, Quartet, Singlet                                                           | 0.191 | (0.000 / 20)  | 0.039 | (0.000 / 10)  | 0.161 | (0.046 / 60)  | 0.137 | (0.070 / 100) | 0.013 | (0.005 / 70)  |
| Erythritol                   | 3.8, 3.7, 3.6                                         | Quartet, Multiplet, Multiplet                                                                               | 0.554 | (0.326 / 60)  | 0.221 | (0.054 / 40)  | 0.583 | (0.178 / 100) | 0.381 | (0.239 / 100) | 0.151 | (0.069 / 30)  |
| Butyric acid                 | 2.1, 1.5, 0.9                                         | Triplet, Multiplet, Triplet                                                                                 | 4.564 | (2.255 / 100) | 1.324 | (0.467 / 100) | 2.551 | (1.217 / 100) | 4.473 | (2.367 / 100) | 1.305 | (0.457 / 90)  |
| 4-Pyridoxic acid             | 7.5, 4.5, 2.3                                         | Singlet, Singlet, Doublet                                                                                   | 0.033 | (0.005 / 80)  | 0.007 | (0.001 / 100) | 0.022 | (0.012 / 100) | 0.024 | (0.016 / 100) | 0.007 | (0.001 / 90)  |
| 1-Methylhistidine            | 7.7, 7.0, 4.0, 3.7, 3.2, 3.1, 3.1                     | Singlet, Singlet, Quartet, Singlet, Doublet, Doublet, Quartet                                               | 0.029 | (0.000 / 20)  | 0.023 | (0.014 / 100) | 0.056 | (0.017 / 100) | 0.013 | (0.002 / 80)  | 0.019 | (0.007 / 100) |
| Mevalonolactone              | 4.6, 4.5, 2.7, 2.7, 2.7, 2.6, 2.1, 1.9, 1.4           | Multiplet, Multiplet, Singlet, Singlet, Doublet, Doublet, Multiplet, Multiplet, Singlet                     | 0.027 | (0.000 / 20)  | 0.010 | (0.002 / 50)  | 0.021 | (0.004 / 60)  | 0.018 | (0.006 / 100) | 0.012 | (0.016 / 100) |
| Levogluconan                 | 5.4, 4.6, 4.1, 3.7, 3.7, 3.5                          | Singlet, Doublet, Quartet, Quartet, Multiplet, Multiplet                                                    | 0.118 | (0.019 / 40)  | 0.018 | (0.007 / 50)  | 0.092 | (0.002 / 20)  | 0.157 | (0.030 / 80)  | 0.074 | (0.022 / 50)  |
| 3-Hydroxymethylglutaric acid | 2.5, 2.4, 2.4, 2.4, 1.3                               | Singlet, Singlet, Singlet, Singlet, Singlet                                                                 | 0.184 | (0.039 / 80)  | 0.068 | (0.024 / 90)  | 0.094 | (0.058 / 90)  | 0.128 | (0.021 / 100) | 0.035 | (0.023 / 90)  |
| 3-Methylxanthine             | 8.0, 3.5                                              | Singlet, Singlet                                                                                            | 5.350 | (1.078 / 80)  | 1.411 | (0.457 / 80)  | 5.416 | (0.907 / 70)  | 1.898 | (0.972 / 100) | 0.691 | (0.397 / 80)  |
| 3-Methylhistidine            | 7.9, 7.0, 3.9, 3.7, 3.3, 3.3, 3.2                     | Singlet, Singlet, Quartet, Singlet, Doublet, Doublet, Quartet                                               | 0.140 | (0.047 / 60)  | 0.025 | (0.017 / 90)  | 0.061 | (0.023 / 20)  | 0.011 | (0.005 / 80)  | 0.013 | (0.012 / 100) |
| 2-Heptanone                  | 2.5, 2.2, 1.5, 1.3, 0.9                               | Triplet, Singlet, Multiplet, Multiplet, Triplet                                                             | 1.176 | (0.243 / 60)  | 0.313 | (0.092 / 80)  | 0.583 | (0.255 / 60)  | 0.084 | (0.000 / 20)  | 0.131 | (0.026 / 30)  |
| Sumiki's acid                | 6.9, 6.5, 4.6                                         | Doublet, Doublet, Singlet                                                                                   | 0.029 | (0.020 / 80)  | 0.004 | (0.002 / 80)  | 0.012 | (0.013 / 80)  | 0.004 | (0.001 / 40)  | 0.004 | (0.002 / 50)  |
| Flavin Mononucleotide        | 7.8, 7.6, 4.4, 4.3, 4.3, 4.1, 4.0, 3.9, 3.8, 2.5, 2.4 | Singlet, Doublet, Multiplet, Multiplet, Quartet, Multiplet, Multiplet, Multiplet, Quartet, Singlet, Singlet | 2.821 | (0.000 / 20)  | 0.659 | (0.335 / 90)  | 1.637 | (0.411 / 60)  | 0.340 | (0.140 / 80)  | 0.294 | (0.113 / 100) |
| Cystine                      | 4.1, 3.4, 3.2                                         | Quartet, Quartet, Quartet                                                                                   | 0.111 | (0.000 / 20)  | 0.078 | (0.043 / 40)  | 0.213 | (0.177 / 20)  | 0.069 | (0.026 / 40)  | 0.018 | (0.000 / 10)  |

|                                 |                                                                      |                                                                                                                         |                     |                     |                     |                     |                     |
|---------------------------------|----------------------------------------------------------------------|-------------------------------------------------------------------------------------------------------------------------|---------------------|---------------------|---------------------|---------------------|---------------------|
| <b>N-Formyl-L-methionine</b>    | 8.1, 4.4, 2.5, 2.1, 2.0                                              | Singlet, Quartet, Multiplet, Multiplet, Multiplet                                                                       | 0.320 (0.116 / 60)  | 0.045 (0.014 / 50)  | 0.213 (0.069 / 100) | 0.108 (0.067 / 80)  | 0.048 (0.012 / 70)  |
| <b>3-Hydroxymandelic acid</b>   | 7.3, 7.0, 6.9, 6.9                                                   | Triplet, Doublet, Triplet, Quartet                                                                                      | 0.448 (0.015 / 40)  | 0.086 (0.033 / 80)  | 0.372 (0.077 / 90)  | 0.334 (0.058 / 80)  | 0.097 (0.047 / 70)  |
| <b>Capric acid</b>              | 2.2, 1.5, 1.3, 0.9                                                   | Singlet, Singlet, Singlet, Multiplet                                                                                    | 0.504 (0.079 / 40)  | 0.301 (0.113 / 60)  | 0.448 (0.149 / 40)  | 0.294 (0.000 / 20)  | 0.301 (0.124 / 20)  |
| <b>Threonine</b>                | 4.2, 3.6, 1.3                                                        | Multiplet, Doublet, Doublet                                                                                             | 0.227 (0.131 / 80)  | 0.041 (0.000 / 10)  | 0.133 (0.040 / 100) | 0.317 (0.089 / 60)  | 0.048 (0.042 / 30)  |
| <b>Beta-Alanine</b>             | 3.2, 2.6                                                             | Triplet, Triplet                                                                                                        | 0.094 (0.023 / 40)  | 0.036 (0.020 / 80)  | 0.070 (0.017 / 50)  | 0.133 (0.063 / 40)  | 0.024 (0.011 / 30)  |
| <b>Alpha-D-Glucose</b>          | 5.2, 4.7, 3.9, 3.9, 3.8, 3.8, 3.7, 3.5, 3.5, 3.4, 3.2                | Doublet, Doublet, Doublet, Doublet, Multiplet, Triplet, Multiplet, Quartet, Multiplet, Quartet                          | 5.696 (3.028 / 80)  | 0.460 (0.288 / 50)  | 0.576 (0.638 / 90)  | 2.892 (1.096 / 80)  | 0.719 (0.405 / 70)  |
| <b>Desaminotyrosine</b>         | 7.2, 6.8, 2.8, 2.4                                                   | Doublet, Doublet, Triplet, Quartet                                                                                      | 0.014 (0.000 / 20)  | 0.004 (0.002 / 20)  | 0.019 (0.006 / 70)  | 0.011 (0.003 / 40)  | 0.004 (0.001 / 50)  |
| <b>Xanthine</b>                 | 7.9                                                                  | Singlet                                                                                                                 | 0.325 (0.184 / 60)  | 0.124 (0.040 / 100) | 0.176 (0.126 / 100) | 0.234 (0.153 / 100) | 0.153 (0.065 / 90)  |
| <b>Indoleacetic acid</b>        | 7.6, 7.5, 7.2, 7.2, 3.6                                              | Doublet, Doublet, Multiplet, Triplet, Singlet                                                                           | 0.017 (0.018 / 80)  | 0.012 (0.010 / 80)  | 0.022 (0.024 / 60)  | 0.009 (0.000 / 20)  | 0.006 (0.001 / 30)  |
| <b>Glycine</b>                  | 3.5                                                                  | Singlet                                                                                                                 | 0.242 (0.096 / 60)  | 0.019 (0.008 / 90)  | 0.124 (0.056 / 90)  | 0.261 (0.181 / 80)  | 0.023 (0.013 / 90)  |
| <b>3-Hydroxyisovaleric acid</b> | 2.3, 1.3                                                             | Singlet, Singlet                                                                                                        | 0.072 (0.059 / 40)  | 0.074 (0.019 / 90)  | 0.156 (0.041 / 80)  | 0.157 (0.050 / 60)  | 0.038 (0.026 / 90)  |
| <b>Putrescine</b>               | 3.0, 1.8                                                             | Multiplet, Multiplet                                                                                                    | 0.067 (0.000 / 40)  | 0.039 (0.000 / 10)  | 0.097 (0.000 / 10)  | 0.026 (0.001 / 40)  | 0.014 (0.007 / 60)  |
| <b>Succinic acid</b>            | 2.4                                                                  | Singlet                                                                                                                 | 0.210 (0.103 / 100) | 0.154 (0.076 / 100) | 0.199 (0.083 / 100) | 0.208 (0.105 / 100) | 0.165 (0.072 / 90)  |
| <b>Riboflavin</b>               | 7.4, 7.4, 4.5, 4.2, 4.0, 3.9, 3.8, 3.7, 2.3, 2.2                     | Singlet, Singlet, Singlet, Multiplet, Multiplet, Quartet, Quartet, Singlet, Singlet                                     | 0.588 (0.304 / 100) | 0.113 (0.058 / 100) | 0.329 (0.132 / 100) | 0.359 (0.270 / 100) | 0.074 (0.030 / 90)  |
| <b>N-Acetyl-L-alanine</b>       | 4.1, 2.0, 1.3                                                        | Multiplet, Singlet, Doublet                                                                                             | 0.055 (0.000 / 20)  | 0.032 (0.015 / 40)  | 0.054 (0.013 / 20)  | 0.024 (0.000 / 20)  | 0.013 (0.021 / 70)  |
| <b>N-Acetylserotonin</b>        | 9.9, 7.9, 7.4, 7.2, 7.1, 6.8, 3.5, 2.9, 1.9                          | Singlet, Singlet, Doublet, Doublet, Doublet, Quartet, Quartet, Triplet, Singlet                                         | 0.051 (0.005 / 80)  | 0.016 (0.011 / 60)  | 0.049 (0.009 / 80)  | 0.006 (0.000 / 20)  | 0.007 (0.006 / 80)  |
| <b>Pantothenic acid</b>         | 4.0, 3.5, 3.5, 3.4, 3.4, 3.4, 2.4, 0.9, 0.9                          | Singlet, Singlet, Singlet, Quartet, Singlet, Singlet, Triplet, Singlet, Singlet                                         | 0.110 (0.062 / 100) | 0.073 (0.039 / 100) | 0.091 (0.053 / 100) | 0.084 (0.037 / 100) | 0.062 (0.019 / 100) |
| <b>m-Cresol</b>                 | 7.2, 6.8, 6.8, 6.7, 2.3                                              | Triplet, Doublet, Triplet, Quartet, Singlet                                                                             | 0.058 (0.008 / 40)  | 0.017 (0.012 / 40)  | 0.046 (0.008 / 50)  | 0.037 (0.010 / 60)  | 0.008 (0.002 / 70)  |
| <b>Valeric acid</b>             | 2.2, 1.5, 1.3, 0.9                                                   | Triplet, Multiplet, Multiplet, Triplet                                                                                  | 3.050 (0.000 / 20)  | 1.560 (0.206 / 40)  | 4.654 (2.348 / 40)  | 1.741 (0.000 / 20)  | 0.448 (0.438 / 20)  |
| <b>Glyceraldehyde</b>           | 9.7, 3.7, 3.6                                                        | Singlet, Quartet, Multiplet                                                                                             | 0.227 (0.000 / 20)  | 0.159 (0.032 / 90)  | 0.177 (0.026 / 60)  | 0.301 (0.075 / 40)  | 0.157 (0.044 / 80)  |
| <b>Gamma-Butyrolactone</b>      | 4.3, 2.5, 2.2                                                        | Triplet, Multiplet, Multiplet                                                                                           | 0.055 (0.000 / 20)  | 0.015 (0.002 / 30)  | 0.033 (0.000 / 10)  | 0.035 (0.011 / 60)  | 0.020 (0.009 / 20)  |
| <b>Cyclic AMP</b>               | 8.2, 6.2, 4.5, 4.3                                                   | Doublet, Singlet, Multiplet, Multiplet                                                                                  | 0.013 (0.000 / 20)  | 0.004 (0.001 / 60)  | 0.013 (0.003 / 50)  | 0.012 (0.004 / 60)  | 0.004 (0.000 / 10)  |
| <b>N-Acetylmannosamine</b>      | 5.1, 5.0, 4.4, 4.3, 4.0, 3.9, 3.8, 3.6, 3.5, 3.5, 3.5, 3.4, 2.1, 2.0 | Doublet, Doublet, Quartet, Quartet, Quartet, Doublet, Multiplet, Triplet, Singlet, Singlet, Singlet, Multiplet, Singlet | 1.981 (0.633 / 40)  | 0.142 (0.155 / 90)  | 0.427 (0.297 / 60)  | 0.952 (0.147 / 60)  | 0.075 (0.069 / 80)  |
| <b>Argininosuccinic acid</b>    | 6.5, 4.2, 3.8, 3.3, 2.8, 2.8, 2.5, 2.5, 2.5, 1.9, 1.7                | Singlet, Quartet, Triplet, Triplet, Doublet, Doublet, Singlet, Doublet, Singlet, Multiplet, Multiplet                   | 1.402 (0.453 / 60)  | 0.343 (0.141 / 70)  | 0.979 (0.191 / 60)  | 0.346 (0.170 / 100) | 0.236 (0.063 / 90)  |
| <b>Citramalic acid</b>          | 2.8, 2.7, 2.5, 2.5, 2.2, 1.3                                         | Singlet, Singlet, Singlet, Singlet, Singlet, Singlet                                                                    | 1.462 (0.000 / 20)  | 0.907 (0.318 / 70)  | 0.810 (0.321 / 50)  | 0.286 (0.221 / 100) | 0.181 (0.069 / 90)  |

|                                   |                                                  |                                                                                                        |                     |                     |                     |                     |                    |
|-----------------------------------|--------------------------------------------------|--------------------------------------------------------------------------------------------------------|---------------------|---------------------|---------------------|---------------------|--------------------|
| <b>Ureidosuccinic acid</b>        | 4.2, 2.7, 2.6, 2.5, 2.4                          | Triplet, Doublet, Doublet, Triplet, Singlet                                                            | 1.646 (0.879 / 100) | 0.183 (0.096 / 40)  | 2.014 (0.368 / 60)  | 0.609 (0.300 / 80)  | 0.142 (0.107 / 20) |
| <b>2-Furoylglycine</b>            | 7.7, 7.2, 6.6, 3.9                               | Doublet, Doublet, Quartet, Doublet                                                                     | 0.887 (0.572 / 60)  | 0.123 (0.040 / 60)  | 0.403 (0.241 / 40)  | 0.143 (0.048 / 80)  | 0.107 (0.028 / 50) |
| <b>Isovalerylglycine</b>          | 3.8, 2.2, 2.0, 0.9                               | Doublet, Doublet, Multiplet, Doublet                                                                   | 0.247 (0.103 / 60)  | 0.038 (0.010 / 60)  | 0.118 (0.041 / 80)  | 0.180 (0.111 / 80)  | 0.035 (0.009 / 60) |
| <b>Xanthosine</b>                 | 7.9, 5.8, 4.4, 4.3, 3.9, 3.9, 3.8, 3.8           | Singlet, Doublet, Quartet, Quartet, Doublet, Doublet, Doublet, Doublet                                 | 0.015 (0.004 / 40)  | 0.011 (0.005 / 50)  | 0.031 (0.017 / 70)  | 0.033 (0.018 / 60)  | 0.014 (0.011 / 60) |
| <b>Hydrocinnamic acid</b>         | 7.4, 7.3, 2.9, 2.5                               | Triplet, Multiplet, Triplet, Triplet                                                                   | 0.099 (0.022 / 100) | 0.035 (0.011 / 90)  | 0.074 (0.013 / 90)  | 0.078 (0.016 / 100) | 0.037 (0.010 / 90) |
| <b>Gulonic acid</b>               | 3.7, 3.7, 3.6, 3.6                               | Multiplicity, Multiplicity, Singlet, Multiplet                                                         | 3.278 (1.476 / 40)  | 0.857 (0.232 / 60)  | 2.693 (0.426 / 40)  | 2.314 (0.392 / 60)  | 0.755 (0.118 / 90) |
| <b>Biotin</b>                     | 4.3, 4.1, 3.1, 2.8, 2.6, 2.6, 2.2, 1.6, 1.5, 1.3 | Quartet, Multiplet, Multiplet, Quartet, Singlet, Singlet, Triplet, Multiplet, Multiplet, Multiplet     | 1.810 (0.762 / 100) | 0.594 (0.304 / 100) | 0.927 (0.465 / 100) | 0.151 (0.069 / 60)  | 0.129 (0.069 / 90) |
| <b>5-Methylcytidine</b>           | 7.7, 5.9, 4.3, 4.2, 4.1, 3.9, 3.9, 3.8, 2.0      | Doublet, Doublet, Quartet, Triplet, Multiplet, Doublet, Doublet, Quartet, Doublet                      | 0.046 (0.000 / 20)  | 0.051 (0.021 / 70)  | 0.095 (0.027 / 20)  | 0.030 (0.012 / 100) | 0.033 (0.012 / 90) |
| <b>3-Hydroxyphenylacetic acid</b> | 7.2, 6.9, 6.8, 3.5                               | Triplet, Doublet, Multiplet, Singlet                                                                   | 0.093 (0.030 / 100) | 0.024 (0.010 / 70)  | 0.045 (0.021 / 90)  | 0.053 (0.001 / 40)  | 0.024 (0.007 / 80) |
| <b>L-3-Phenyllactic acid</b>      | 7.4, 7.3, 4.3, 3.1, 3.1, 2.9                     | Multiplet, Multiplet, Quartet, Doublet, Doublet, Quartet                                               | 0.057 (0.014 / 40)  | 0.011 (0.007 / 60)  | 0.040 (0.006 / 30)  | 0.037 (0.000 / 20)  | 0.018 (0.015 / 60) |
| <b>1-Methyladenosine</b>          | 8.4, 8.4, 8.2, 8.1, 6.1, 6.0, 4.4, 4.3, 3.9, 3.9 | Singlet, Singlet, Singlet, Singlet, Doublet, Doublet, Multiplet, Multiplet, Multiplet, Multiplet       | 0.137 (0.076 / 80)  | 0.015 (0.005 / 70)  | 0.058 (0.037 / 80)  | 0.019 (0.003 / 80)  | 0.037 (0.022 / 80) |
| <b>4-Hydroxyproline</b>           | 4.3, 3.5, 3.4, 3.3, 2.4, 2.1                     | Quartet, Quartet, Doublet, Doublet, Multiplet, Multiplet                                               | 0.130 (0.070 / 80)  | 0.033 (0.016 / 90)  | 0.100 (0.031 / 100) | 0.020 (0.000 / 20)  | 0.016 (0.005 / 80) |
| <b>Picolinic acid</b>             | 8.6, 8.0, 7.9, 7.5                               | Doublet, Multiplet, Multiplet, Multiplet                                                               | 0.081 (0.042 / 60)  | 0.015 (0.004 / 40)  | 0.035 (0.025 / 40)  | 0.019 (0.000 / 20)  | 0.016 (0.005 / 20) |
| <b>Alanine</b>                    | 3.8, 1.5                                         | Quartet, Doublet                                                                                       | 0.458 (0.246 / 80)  | 0.159 (0.054 / 100) | 0.261 (0.088 / 100) | 0.440 (0.233 / 100) | 0.118 (0.033 / 90) |
| <b>Arabinose</b>                  | 5.3, 5.2, 4.5, 4.1, 4.0, 4.0, 3.9, 3.8, 3.7, 3.5 | Doublet, Quartet, Doublet, Multiplet, Multiplet, Multiplet, Multiplet, Multiplet, Multiplet, Multiplet | 0.278 (0.129 / 100) | 0.050 (0.011 / 50)  | 0.164 (0.028 / 90)  | 0.662 (0.107 / 60)  | 0.147 (0.053 / 50) |
| <b>Formic acid</b>                | 8.4                                              | Singlet                                                                                                | 0.044 (0.022 / 60)  | 0.088 (0.027 / 80)  | 0.034 (0.017 / 100) | 0.038 (0.022 / 80)  | 0.091 (0.026 / 70) |
| <b>Mevalonic acid</b>             | 4.5, 4.5, 2.7, 2.7, 2.6, 2.6, 2.0, 1.9, 1.4      | Multiplet, Multiplet, Singlet, Singlet, Doublet, Doublet, Multiplet, Multiplet, Singlet                | 0.220 (0.058 / 40)  | 0.053 (0.018 / 20)  | 0.121 (0.021 / 30)  | 0.128 (0.039 / 80)  | 0.036 (0.017 / 90) |
| <b>Indolelactic acid</b>          | 7.7, 7.5, 7.2, 7.2, 4.3, 3.3, 3.2, 3.1           | Doublet, Doublet, Multiplet, Multiplet, Quartet, Doublet, Doublet, Quartet                             | 0.024 (0.014 / 80)  | 0.022 (0.014 / 70)  | 0.026 (0.022 / 90)  | 0.010 (0.000 / 20)  | 0.020 (0.008 / 40) |
| <b>Methylsuccinic acid</b>        | 2.6, 2.5, 2.1, 2.1, 2.1, 1.1                     | Multiplet, Quartet, Singlet, Doublet, Singlet, Doublet                                                 | 0.085 (0.035 / 60)  | 0.007 (0.000 / 20)  | 0.043 (0.019 / 50)  | 0.040 (0.000 / 20)  | 0.009 (0.009 / 50) |
| <b>Glucose 6-phosphate</b>        | 5.2, 4.6, 4.0, 4.0, 3.9, 3.9, 3.7, 3.6, 3.5, 3.3 | Doublet, Doublet, Multiplet, Quartet, Multiplet, Doublet, Triplet, Multiplet, Multiplet, Quartet       | 0.223 (0.160 / 80)  | 0.094 (0.030 / 80)  | 0.163 (0.128 / 100) | 0.081 (0.016 / 60)  | 0.054 (0.008 / 50) |
| <b>4-Methylcatechol</b>           | 6.8, 6.8, 6.7, 2.2                               | Doublet, Doublet, Quartet, Singlet                                                                     | 0.131 (0.000 / 20)  | 0.012 (0.014 / 90)  | 0.047 (0.023 / 90)  | 0.034 (0.007 / 100) | 0.009 (0.006 / 70) |
| <b>Dimethylsulfide</b>            | 2.1                                              | Singlet                                                                                                | 2.280 (0.586 / 80)  | 0.233 (0.050 / 30)  | 1.324 (0.426 / 100) | 0.695 (0.223 / 100) | 0.207 (0.020 / 60) |
| <b>Nicotinic acid</b>             | 8.9, 8.6, 8.3, 7.5                               | Doublet, Quartet, Quartet, Quartet                                                                     | 0.399 (0.157 / 80)  | 0.160 (0.027 / 80)  | 0.331 (0.090 / 100) | 0.405 (0.137 / 100) | 0.164 (0.026 / 70) |

|                                       |                                                                           |                                                                                                                                                       |                     |                     |                     |                     |                     |
|---------------------------------------|---------------------------------------------------------------------------|-------------------------------------------------------------------------------------------------------------------------------------------------------|---------------------|---------------------|---------------------|---------------------|---------------------|
| <b>Gluconic acid</b>                  | 4.1, 4.0, 3.8, 3.8, 3.7                                                   | Doublet, Triplet, Multiplet, Multiplet, Multiplet                                                                                                     | 1.082 (0.316 / 80)  | 0.167 (0.070 / 100) | 0.669 (0.312 / 100) | 0.837 (0.051 / 40)  | 0.155 (0.059 / 90)  |
| <b>N-Butyrylglycine</b>               | 3.9, 2.3, 1.6, 0.9                                                        | Doublet, Triplet, Multiplet, Triplet                                                                                                                  | 0.243 (0.016 / 40)  | 0.040 (0.000 / 10)  | 0.257 (0.061 / 90)  | 0.067 (0.000 / 20)  | 0.048 (0.000 / 10)  |
| <b>Theophylline</b>                   | 8.0, 3.5, 3.3                                                             | Singlet, Singlet, Singlet                                                                                                                             | 0.006 (0.000 / 20)  | 0.005 (0.003 / 30)  | 0.021 (0.009 / 40)  | 0.003 (0.001 / 100) | 0.196 (0.432 / 60)  |
| <b>Gabapentin</b>                     | 3.0, 2.4, 1.5, 1.4                                                        | Singlet, Singlet, Multiplet, Multiplet                                                                                                                | 0.331 (0.228 / 100) | 0.019 (0.000 / 10)  | 0.158 (0.071 / 70)  | 0.057 (0.046 / 100) | 0.025 (0.007 / 50)  |
| <b>Lactic acid</b>                    | 4.1, 1.3                                                                  | Quartet, Doublet                                                                                                                                      | 0.151 (0.052 / 40)  | 0.040 (0.019 / 30)  | 0.105 (0.027 / 40)  | 0.137 (0.000 / 20)  | 0.093 (0.031 / 20)  |
| <b>Hydroxyacetone</b>                 | 4.4, 2.1                                                                  | Singlet, Singlet                                                                                                                                      | 0.160 (0.077 / 100) | 0.034 (0.018 / 90)  | 0.094 (0.030 / 80)  | 0.173 (0.058 / 60)  | 0.060 (0.021 / 90)  |
| <b>2-Isopropylmalic acid</b>          | 2.7, 2.7, 2.6, 2.5, 1.9, 0.9, 0.9                                         | Singlet, Singlet, Singlet, Singlet, Triplet, Doublet, Doublet                                                                                         | 5.971 (2.668 / 60)  | 1.785 (1.351 / 60)  | 4.081 (1.655 / 90)  | 0.426 (0.106 / 100) | 0.357 (0.243 / 100) |
| <b>N-Phenylacetylphenylalanine</b>    | 7.7, 7.3, 7.3, 7.3, 7.3, 7.3, 7.2, 7.2, 7.1, 7.1, 4.5, 3.6, 3.5, 3.2, 2.9 | Doublet, Multiplet, Multiplet, Multiplet, Multiplet, Multiplet, Doublet, Doublet, Multiplet, Multiplet, Multiplet, Doublet, Doublet, Quartet, Quartet | 0.031 (0.010 / 40)  | 0.026 (0.008 / 90)  | 0.052 (0.000 / 10)  | 0.016 (0.005 / 40)  | 0.016 (0.003 / 60)  |
| <b>Hydroxyphenyllactic acid</b>       | 7.2, 6.8, 4.3, 3.0, 2.9                                                   | Doublet, Multiplet, Quartet, Quartet, Multiplet                                                                                                       | 0.329 (0.088 / 80)  | 0.079 (0.023 / 70)  | 0.182 (0.032 / 70)  | 0.172 (0.000 / 20)  | 0.072 (0.028 / 80)  |
| <b>Cytidine monophosphate</b>         | 8.1, 6.1, 6.0, 4.3, 4.2, 4.0, 4.0                                         | Doublet, Doublet, Doublet, Multiplet, Doublet, Multiplet, Multiplet                                                                                   | 0.016 (0.003 / 60)  | 0.012 (0.002 / 50)  | 0.021 (0.004 / 80)  | 0.022 (0.008 / 40)  | 0.014 (0.004 / 60)  |
| <b>N-Acetyl-L-tyrosine</b>            | 7.7, 7.2, 6.9, 4.4, 3.1, 2.8, 1.9                                         | Doublet, Doublet, Doublet, Multiplet, Quartet, Quartet, Singlet                                                                                       | 0.579 (0.158 / 60)  | 0.171 (0.055 / 70)  | 0.369 (0.089 / 60)  | 0.195 (0.090 / 40)  | 0.124 (0.042 / 80)  |
| <b>Butanone</b>                       | 2.6, 2.2, 1.0                                                             | Quartet, Singlet, Triplet                                                                                                                             | 0.196 (0.028 / 60)  | 0.037 (0.020 / 60)  | 0.064 (0.044 / 70)  | 0.065 (0.000 / 20)  | 0.020 (0.005 / 40)  |
| <b>Glucose</b>                        | 5.2, 4.6, 3.9, 3.9, 3.8, 3.8, 3.7, 3.5, 3.5, 3.4, 3.2                     | Doublet, Doublet, Doublet, Doublet, Multiplet, Triplet, Multiplet, Quartet, Multiplet, Multiplet, Quartet                                             | 0.328 (0.306 / 60)  | 0.057 (0.030 / 90)  | 0.197 (0.155 / 100) | 0.366 (0.098 / 100) | 0.065 (0.014 / 60)  |
| <b>Isoferulic acid</b>                | 7.3, 7.3, 7.1, 7.0, 6.4, 6.3, 3.9                                         | Singlet, Singlet, Triplet, Doublet, Singlet, Singlet, Singlet                                                                                         | 0.006 (0.000 / 20)  | 0.013 (0.005 / 40)  | 0.022 (0.010 / 70)  | 0.005 (0.002 / 60)  | 0.035 (0.040 / 30)  |
| <b>Cytidine</b>                       | 7.8, 6.0, 5.9, 4.3, 4.2, 4.1, 3.9, 3.9, 3.8                               | Doublet, Doublet, Doublet, Quartet, Triplet, Multiplet, Doublet, Doublet, Quartet                                                                     | - (- / 0)           | 0.013 (0.002 / 50)  | 0.019 (0.000 / 10)  | 0.046 (0.000 / 20)  | 0.019 (0.008 / 60)  |
| <b>Ortho-Hydroxyphenylacetic acid</b> | 7.2, 6.9, 3.6                                                             | Multiplet, Multiplet, Singlet                                                                                                                         | - (- / 0)           | 0.078 (0.022 / 40)  | 0.214 (0.035 / 30)  | 0.111 (0.043 / 60)  | 0.048 (0.012 / 70)  |
| <b>Rhamnose</b>                       | 5.1, 3.9, 3.9, 3.8, 3.6, 3.4, 3.4, 3.4, 1.3                               | Doublet, Multiplet, Quartet, Quartet, Quartet, Singlet, Singlet, Multiplet, Quartet                                                                   | - (- / 0)           | 0.018 (0.019 / 80)  | 0.016 (0.000 / 10)  | 0.129 (0.055 / 60)  | 0.056 (0.016 / 50)  |
| <b>Alpha-Hydroxyisobutyric acid</b>   | 1.3                                                                       | Singlet                                                                                                                                               | - (- / 0)           | 0.011 (0.000 / 10)  | 0.015 (0.005 / 30)  | 0.050 (0.014 / 60)  | 0.014 (0.006 / 40)  |
| <b>p-Aminobenzoic acid</b>            | 7.7, 6.8                                                                  | Doublet, Doublet                                                                                                                                      | - (- / 0)           | 0.007 (0.002 / 30)  | 0.012 (0.000 / 10)  | 0.017 (0.000 / 20)  | 0.007 (0.001 / 20)  |
| <b>2-Hydroxybutyric acid</b>          | 4.0, 0.9                                                                  | Quartet, Triplet                                                                                                                                      | - (- / 0)           | 0.105 (0.000 / 10)  | 0.575 (0.477 / 40)  | 0.353 (0.000 / 20)  | 0.163 (0.020 / 20)  |
| <b>Beta-N-Acetylglucosamine</b>       | 5.2, 3.9, 3.9, 3.8, 3.7, 3.5, 3.5, 3.5, 2.0                               | Doublet, Doublet, Multiplet, Multiplet, Quartet, Triplet, Singlet, Multiplet, Singlet                                                                 | - (- / 0)           | 0.170 (0.072 / 80)  | 0.475 (0.267 / 80)  | 0.451 (0.266 / 100) | 0.158 (0.099 / 90)  |
| <b>Tartaric acid</b>                  | 4.3                                                                       | Singlet                                                                                                                                               | - (- / 0)           | 0.075 (0.026 / 60)  | 0.238 (0.000 / 10)  | 0.152 (0.000 / 20)  | 0.092 (0.007 / 20)  |
| <b>Hydroxyoctanoic acid</b>           | 4.0, 1.7, 1.6, 1.3, 0.9                                                   | Quartet, Multiplet, Multiplet, Multiplet, Multiplet                                                                                                   | - (- / 0)           | 0.081 (0.020 / 70)  | 0.194 (0.074 / 30)  | 0.186 (0.000 / 20)  | 0.078 (0.017 / 60)  |

|                                       |                                                            |                                                                                                                  |                     |                     |                     |                     |                    |
|---------------------------------------|------------------------------------------------------------|------------------------------------------------------------------------------------------------------------------|---------------------|---------------------|---------------------|---------------------|--------------------|
| <b>Methionine</b>                     | 3.9, 2.6, 2.2, 2.1, 2.1                                    | Quartet, Triplet, Multiplet, Singlet, Multiplet                                                                  | - (- / 0)           | 0.009 (0.006 / 20)  | 0.040 (0.006 / 40)  | 0.029 (0.007 / 80)  | 0.002 (0.000 / 10) |
| <b>S-Adenosylhomocysteine</b>         | 8.4, 8.3, 6.1, 4.9, 4.4, 4.3, 3.8, 3.1, 3.0, 2.7, 2.1, 2.1 | Singlet, Singlet, Doublet, Triplet, Triplet, Multiplet, Quartet, Quartet, Quartet, Triplet, Multiplet, Multiplet | - (- / 0)           | 0.016 (0.002 / 60)  | 0.062 (0.023 / 90)  | 0.047 (0.000 / 20)  | 0.029 (0.000 / 10) |
| <b>Acetylcarnitine</b>                | 5.6, 3.8, 3.6, 3.6, 3.2, 2.6, 2.6, 2.5, 2.1                | Quartet, Quartet, Singlet, Singlet, Singlet, Doublet, Doublet, Quartet, Singlet                                  | 0.178 (0.000 / 20)  | 0.049 (0.014 / 70)  | 0.114 (0.019 / 20)  | 0.039 (0.012 / 40)  | 0.023 (0.022 / 80) |
| <b>N-Acetylgalactosamine</b>          | 5.2, 4.1, 4.0, 3.9, 3.7, 2.0                               | Doublet, Multiplet, Multiplet, Multiplet, Multiplet, Quartet                                                     | - (- / 0)           | 0.095 (0.000 / 10)  | 0.582 (0.144 / 40)  | 0.095 (0.000 / 20)  | 0.159 (0.058 / 50) |
| <b>Methylcysteine</b>                 | 3.9, 3.1, 3.1, 3.0, 2.2                                    | Quartet, Doublet, Doublet, Quartet, Singlet                                                                      | - (- / 0)           | 0.183 (0.208 / 100) | 0.766 (0.716 / 60)  | 0.546 (0.164 / 80)  | 0.066 (0.053 / 90) |
| <b>1,3,7-Trime-thyluric acid</b>      | 3.4, 3.3, 3.2                                              | Singlet, Singlet, Singlet                                                                                        | 0.390 (0.015 / 40)  | - (- / 0)           | 0.049 (0.023 / 50)  | 0.044 (0.030 / 100) | 0.037 (0.041 / 50) |
| <b>Homogentisic acid</b>              | 6.8, 6.7, 3.5                                              | Triplet, Multiplet, Singlet                                                                                      | 0.393 (0.002 / 40)  | - (- / 0)           | 0.183 (0.032 / 50)  | 0.082 (0.000 / 20)  | 0.073 (0.018 / 70) |
| <b>Threitol</b>                       | 3.7, 3.7, 3.6                                              | Multiplet, Doublet, Quartet                                                                                      | 0.714 (0.264 / 40)  | - (- / 0)           | 0.306 (0.000 / 10)  | 0.397 (0.196 / 60)  | 0.061 (0.044 / 20) |
| <b>Glycyl-glycine</b>                 | 3.8, 3.8                                                   | Singlet, Singlet                                                                                                 | 0.154 (0.039 / 40)  | - (- / 0)           | 0.080 (0.016 / 30)  | 0.102 (0.050 / 100) | 0.012 (0.002 / 30) |
| <b>2-Aminoisobutyric acid</b>         | 1.5                                                        | Singlet                                                                                                          | 0.059 (0.000 / 20)  | - (- / 0)           | 0.016 (0.006 / 30)  | 0.011 (0.006 / 100) | 0.029 (0.063 / 80) |
| <b>Methylamine</b>                    | 2.6                                                        | Singlet                                                                                                          | 0.160 (0.001 / 40)  | - (- / 0)           | 0.114 (0.065 / 80)  | 0.162 (0.043 / 100) | 0.011 (0.008 / 70) |
| <b>Adenosine mono-phosphate</b>       | 8.6, 8.2, 6.1, 4.5, 4.4, 4.0                               | Singlet, Doublet, Quartet, Doublet, Quartet                                                                      | 0.023 (0.013 / 60)  | - (- / 0)           | 0.010 (0.000 / 10)  | 0.006 (0.000 / 20)  | 0.007 (0.001 / 30) |
| <b>Pyruvic acid</b>                   | 2.4                                                        | Singlet                                                                                                          | 0.046 (0.000 / 20)  | - (- / 0)           | 0.049 (0.005 / 20)  | 0.018 (0.014 / 100) | 0.011 (0.004 / 40) |
| <b>Guanidinosuccinic acid</b>         | 4.2, 2.8, 2.8, 2.5, 2.5                                    | Quartet, Doublet, Doublet, Singlet, Triplet                                                                      | 0.030 (0.000 / 20)  | - (- / 0)           | 0.010 (0.000 / 10)  | 0.033 (0.014 / 40)  | 0.024 (0.010 / 30) |
| <b>Cysteine-S-sulfate</b>             | 4.2, 3.7, 3.7, 3.5                                         | Quartet, Doublet, Doublet, Quartet                                                                               | 0.587 (0.335 / 40)  | - (- / 0)           | 0.715 (0.000 / 10)  | 0.716 (0.000 / 20)  | 0.038 (0.030 / 20) |
| <b>dCMP</b>                           | 8.0, 6.3, 6.1, 4.6, 4.2, 4.0, 2.4, 2.3                     | Doublet, Triplet, Doublet, Multiplet, Multiplet, Multiplet, Multiplet, Multiplet, Multiplet                      | 0.166 (0.000 / 20)  | - (- / 0)           | 0.129 (0.000 / 10)  | 0.169 (0.000 / 20)  | 0.020 (0.000 / 10) |
| <b>2-Hydroxy-3-methylbutyric acid</b> | 3.9, 2.0, 1.0, 0.8                                         | Doublet, Multiplet, Doublet, Doublet                                                                             | 3.252 (0.000 / 20)  | - (- / 0)           | 1.575 (0.000 / 10)  | 2.796 (1.273 / 40)  | 0.935 (0.215 / 20) |
| <b>3-Methyl-2-oxo-valeric acid</b>    | 2.9, 1.7, 1.5, 1.1, 0.9                                    | Multiplet, Multiplet, Multiplet, Doublet, Triplet                                                                | 1.120 (0.362 / 100) | - (- / 0)           | 0.500 (0.319 / 70)  | 1.417 (0.677 / 60)  | 0.004 (0.000 / 10) |
| <b>Methanol</b>                       | 3.3                                                        | Singlet                                                                                                          | 0.263 (0.120 / 100) | - (- / 0)           | 0.665 (0.143 / 100) | 0.056 (0.103 / 100) | 0.001 (0.000 / 30) |
| <b>Trimethylamine N-oxide</b>         | 3.2                                                        | Singlet                                                                                                          | 0.006 (0.000 / 20)  | - (- / 0)           | 0.011 (0.010 / 20)  | 0.003 (0.001 / 100) | 0.001 (0.001 / 40) |
| <b>Methylguanidine</b>                | 3.4, 2.8                                                   | Singlet, Singlet                                                                                                 | 0.193 (0.163 / 40)  | - (- / 0)           | 0.134 (0.075 / 50)  | 0.032 (0.020 / 80)  | 0.019 (0.009 / 40) |
| <b>Citric acid</b>                    | 2.7, 2.6, 2.5, 2.5                                         | Singlet, Singlet, Singlet, Singlet                                                                               | 0.043 (0.000 / 20)  | - (- / 0)           | 0.057 (0.012 / 80)  | 0.007 (0.004 / 80)  | 0.007 (0.003 / 70) |
| <b>Ketoisovaleric acid</b>            | 3.0, 1.1                                                   | Multiplet, Doublet                                                                                               | 0.044 (0.026 / 80)  | - (- / 0)           | 0.039 (0.017 / 80)  | 0.052 (0.029 / 40)  | 0.098 (0.000 / 10) |
| <b>Trehalose</b>                      | 5.2, 3.9, 3.8, 3.6, 3.4                                    | Doublet, Doublet, Multiplet, Quartet, Triplet                                                                    | 0.093 (0.035 / 80)  | - (- / 0)           | 0.093 (0.059 / 50)  | 0.177 (0.018 / 40)  | - (- / 0)          |
| <b>Epicatechin</b>                    | 7.0, 6.9, 6.1, 6.1, 4.3, 2.9, 2.8, 2.7                     | Doublet, Multiplet, Doublet, Doublet, Multiplet, Multiplet, Doublet, Doublet                                     | 0.120 (0.040 / 40)  | 0.060 (0.032 / 50)  | - (- / 0)           | 0.104 (0.057 / 40)  | 0.111 (0.062 / 80) |
| <b>Ribothymidine</b>                  | 7.7, 5.9, 4.3, 4.2, 4.1, 3.9                               | Doublet, Doublet, Triplet, Triplet, Multiplet, Doublet                                                           | 0.048 (0.000 / 20)  | 0.009 (0.003 / 50)  | - (- / 0)           | 0.012 (0.007 / 80)  | 0.117 (0.250 / 70) |

|                                 |                                              |                                                                                           |                     |                     |                     |                     |                     |  |
|---------------------------------|----------------------------------------------|-------------------------------------------------------------------------------------------|---------------------|---------------------|---------------------|---------------------|---------------------|--|
|                                 | 3.9, 3.8, 1.9, 1.9                           | Doublet, Quartet, Doublet, Doublet                                                        |                     |                     |                     |                     |                     |  |
| <b>Uridine 5'-monophosphate</b> | 8.1, 6.0, 4.4, 4.3, 4.0, 4.0                 | Doublet, Quartet, Triplet, Triplet, Multiplet, Multiplet                                  | 0.030 (0.000 / 20)  | 0.021 (0.000 / 10)  | - (- / 0)           | 0.032 (0.000 / 20)  | 0.020 (0.000 / 10)  |  |
| <b>Phosphorylcholine</b>        | 4.2, 3.6, 3.2                                | Multiplet, Multiplet, Singlet                                                             | 0.343 (0.000 / 20)  | 0.028 (0.000 / 10)  | - (- / 0)           | 0.028 (0.000 / 20)  | 0.006 (0.000 / 10)  |  |
| <b>Sarcosine</b>                | 3.6, 2.7                                     | Singlet, Singlet                                                                          | 0.023 (0.000 / 20)  | 0.011 (0.000 / 10)  | - (- / 0)           | 0.010 (0.005 / 100) | 0.007 (0.003 / 90)  |  |
| <b>Hypoxanthine</b>             | 8.2, 8.2                                     | Singlet, Singlet                                                                          | 0.040 (0.000 / 20)  | 0.048 (0.022 / 20)  | - (- / 0)           | 0.007 (0.000 / 20)  | 0.033 (0.024 / 30)  |  |
| <b>1-Methylguanosine</b>        | 8.0, 5.9, 4.4, 4.2, 3.9, 3.8, 3.5            | Singlet, Doublet, Quartet, Triplet, Quartet, Quartet, Singlet                             | 0.029 (0.002 / 40)  | 0.037 (0.000 / 10)  | - (- / 0)           | 0.014 (0.006 / 60)  | 0.021 (0.011 / 40)  |  |
| <b>Indole</b>                   | 7.7, 7.5, 7.2, 7.1, 6.6                      | Doublet, Doublet, Multiplet, Multiplet, Triplet                                           | 0.128 (0.000 / 20)  | 0.025 (0.005 / 70)  | 0.050 (0.000 / 10)  | 0.023 (0.000 / 20)  | 0.029 (0.013 / 60)  |  |
| <b>Pyrimidine</b>               | 9.1, 8.8, 7.6                                | Singlet, Doublet, Multiplet                                                               | 0.048 (0.000 / 20)  | 0.042 (0.000 / 10)  | 0.042 (0.006 / 30)  | - (- / 0)           | 0.040 (0.000 / 10)  |  |
| <b>Ureidopropionic acid</b>     | 3.3, 2.4                                     | Quartet, Triplet                                                                          | 0.170 (0.000 / 20)  | 0.060 (0.000 / 10)  | 0.147 (0.000 / 10)  | - (- / 0)           | 0.029 (0.009 / 60)  |  |
| <b>N-Acetylglutamine</b>        | 8.0, 7.06, 6.8, 4.2, 2.3, 2.3, 2.1, 2.0, 1.9 | Doublet, Singlet, Singlet, Multiplet, Multiplet, Multiplet, Multiplet, Singlet, Multiplet | 0.078 (0.038 / 80)  | 0.032 (0.013 / 30)  | 0.076 (0.043 / 20)  | - (- / 0)           | 0.005 (0.000 / 10)  |  |
| <b>Sedoheptulose</b>            | 4.0, 3.9, 3.8, 3.8, 3.6                      | Quartet, Multiplet, Singlet, Quartet, Doublet                                             | 0.327 (0.009 / 60)  | 0.066 (0.017 / 50)  | 0.232 (0.040 / 20)  | 0.367 (0.000 / 20)  | 0.052 (0.009 / 50)  |  |
| <b>Tryptamine</b>               | 7.7, 7.5, 7.3, 7.3, 7.2, 3.3, 3.2            | Doublet, Doublet, Singlet, Multiplet, Multiplet, Triplet, Triplet                         | 0.080 (0.039 / 80)  | 0.031 (0.009 / 80)  | 0.049 (0.027 / 90)  | 0.033 (0.000 / 20)  | 0.016 (0.008 / 90)  |  |
| <b>Kynurenine</b>               | 7.8, 7.4, 6.9, 6.8, 4.1, 3.7                 | Quartet, Multiplet, Quartet, Multiplet, Quartet, Multiplet                                | 1.569 (0.641 / 80)  | 0.372 (0.215 / 90)  | 0.970 (0.299 / 100) | - (- / 0)           | 0.321 (0.116 / 60)  |  |
| <b>Hexadecanedioic acid</b>     | 2.2, 1.9, 1.9, 1.7, 1.6, 1.4, 1.3, 1.1       | Multiplet, Multiplet, Multiplet, Multiplet, Multiplet, Multiplet, Multiplet               | 0.435 (0.170 / 60)  | 0.095 (0.034 / 100) | 0.855 (0.359 / 80)  | - (- / 0)           | 0.026 (0.000 / 10)  |  |
| <b>3-Methylindole</b>           | 7.7, 7.5, 7.2, 7.2, 2.3                      | Doublet, Doublet, Multiplet, Multiplet, Doublet                                           | 0.020 (0.014 / 100) | 0.010 (0.004 / 100) | 0.029 (0.008 / 100) | - (- / 0)           | 0.012 (0.005 / 50)  |  |
| <b>L-Dopa</b>                   | 6.9, 6.8, 6.7, 3.9, 3.2, 3.1, 3.0            | Doublet, Doublet, Quartet, Quartet, Doublet, Doublet, Quartet                             | 0.033 (0.000 / 20)  | 0.024 (0.008 / 60)  | 0.014 (0.000 / 10)  | - (- / 0)           | 0.025 (0.010 / 50)  |  |
| <b>o-Cresol</b>                 | 7.2, 7.1, 6.9, 2.2                           | Doublet, Multiplet, Multiplet, Singlet                                                    | 0.149 (0.124 / 60)  | 0.127 (0.032 / 50)  | 0.143 (0.130 / 70)  | - (- / 0)           | 0.063 (0.037 / 100) |  |
| <b>5'-Methylthioadenosine</b>   | 8.5, 8.4, 6.1, 4.4, 4.3, 2.9, 2.1            | Singlet, Singlet, Doublet, Triplet, Multiplet, Multiplet, Singlet                         | 0.003 (0.000 / 20)  | 0.002 (0.001 / 40)  | 0.002 (0.000 / 10)  | - (- / 0)           | 0.053 (0.086 / 40)  |  |
| <b>N6-Acetyl-L-lysine</b>       | 3.7, 3.2, 2.0, 1.9, 1.6, 1.4                 | Quartet, Quartet, Singlet, Multiplet, Multiplet, Multiplet                                | 2.009 (0.000 / 20)  | 0.484 (0.293 / 50)  | 1.148 (0.160 / 40)  | - (- / 0)           | 0.089 (0.024 / 40)  |  |
| <b>Deoxyuridine</b>             | 7.8, 6.3, 5.9, 4.5, 4.1, 3.8, 3.8, 2.4       | Doublet, Triplet, Doublet, Multiplet, Multiplet, Quartet, Quartet, Multiplet              | 0.050 (0.027 / 80)  | 0.016 (0.004 / 50)  | 0.041 (0.016 / 80)  | - (- / 0)           | 0.019 (0.006 / 50)  |  |
| <b>Mannose</b>                  | 5.2, 3.9, 3.9, 3.8, 3.6, 3.6, 3.5, 3.4       | Doublet, Multiplet, Quartet, Multiplet, Multiplet, Doublet, Singlet, Multiplet            | 0.802 (0.304 / 100) | 0.126 (0.067 / 100) | 0.387 (0.298 / 80)  | - (- / 0)           | 0.124 (0.014 / 80)  |  |
| <b>Mannose 6-phosphate</b>      | 5.2, 4.0, 3.9, 3.8, 3.7, 3.4                 | Singlet, Multiplet, Quartet, Triplet, Multiplet, Multiplet                                | 0.076 (0.035 / 40)  | 0.066 (0.025 / 70)  | 0.171 (0.068 / 80)  | - (- / 0)           | 0.424 (0.399 / 20)  |  |
| <b>Cinnamic acid</b>            | 7.6, 7.4, 7.4, 6.5, 6.5                      | Multiplet, Multiplet, Singlet, Singlet, Singlet                                           | 0.257 (0.101 / 100) | 0.042 (0.015 / 50)  | 0.123 (0.056 / 100) | - (- / 0)           | 0.026 (0.009 / 50)  |  |
| <b>Taurodeoxycholic acid</b>    | 7.9, 4.0, 3.6, 3.6, 3.1, 2.3,                | Triplet, Doublet, Multiplet, Quartet, Triplet, Multiplet,                                 | 0.048 (0.014 / 40)  | 0.018 (0.009 / 90)  | 0.030 (0.025 / 100) | - (- / 0)           | 0.019 (0.002 / 30)  |  |

|                            |                                                                     |                                                                                                                                    |                        |                        |                        |                        |                       |  |
|----------------------------|---------------------------------------------------------------------|------------------------------------------------------------------------------------------------------------------------------------|------------------------|------------------------|------------------------|------------------------|-----------------------|--|
|                            | 2.1, 1.9, 1.8,<br>1.7, 1.6, 1.6,<br>1.5, 1.4, 1.2,<br>1.0, 0.9, 0.7 | Multiplet, Singlet, Singlet,<br>Multiplet, Singlet, Dou-<br>blet, Multiplet, Singlet,<br>Multiplet, Doublet, Sin-<br>glet, Singlet |                        |                        |                        |                        |                       |  |
| Kynurenic acid             | 7.9, 7.6, 7.5,<br>7.3, 6.7                                          | Doublet, Multiplet, Dou-<br>blet, Quartet, Singlet                                                                                 | 0.039 (0.016<br>/ 60)  | 0.013 (0.003<br>/ 40)  | 0.031 (0.004<br>/ 50)  | - (- / 0)              | 0.014 (0.004<br>/ 60) |  |
| 2-Oxohexane                | 2.5, 2.2, 1.5,<br>1.3, 0.9                                          | Triplet, Singlet, Multiplet,<br>Multiplet, Triplet                                                                                 | 0.584 (0.076<br>/ 60)  | 0.170 (0.130<br>/ 50)  | 0.472 (0.259<br>/ 80)  | - (- / 0)              | 0.095 (0.035<br>/ 50) |  |
| Caffeic acid               | 7.3, 7.3, 7.1,<br>7.1, 6.9, 6.3,<br>6.3                             | Singlet, Singlet, Doublet,<br>Quartet, Doublet, Singlet,<br>Singlet                                                                | 0.088 (0.020<br>/ 60)  | 0.021 (0.002<br>/ 30)  | 0.075 (0.026<br>/ 40)  | - (- / 0)              | 0.016 (0.00<br>/ 40)  |  |
| 4-Hydroxyben-<br>zoic acid | 7.8, 6.9                                                            | Doublet, Doublet                                                                                                                   | 0.005 (0.000<br>/ 20)  | 0.008 (0.005<br>/ 20)  | 0.021 (0.004<br>/ 40)  | - (- / 0)              | 0.014 (0.000<br>/ 10) |  |
| Hydrochlorothia-<br>zide   | 8.2, 7.1                                                            | Singlet, Singlet                                                                                                                   | 0.663 (0.179<br>/ 40)  | 0.169 (0.062<br>/ 70)  | 0.230 (0.160<br>/ 20)  | - (- / 0)              | 0.113 (0.029<br>/ 40) |  |
| Tryptophan                 | 7.7, 7.5, 7.3,<br>7.3, 7.2, 4.0,<br>3.5, 3.5, 3.3                   | Doublet, Doublet, Singlet,<br>Multiplet, Multiplet, Quar-<br>tet, Doublet, Doublet,<br>Quartet                                     | 0.053 (0.026<br>/ 100) | 0.024 (0.012<br>/ 100) | 0.044 (0.016<br>/ 100) | - (- / 0)              | 0.016 (0.007<br>/ 80) |  |
| Glucuronic acid            | 5.3, 4.6, 4.1,<br>4.1, 3.7, 3.6,<br>3.5, 3.3                        | Triplet, Singlet, Singlet,<br>Singlet, Multiplet, Quartet,<br>Multiplet, Triplet                                                   | 0.172 (0.108<br>/ 60)  | 0.019 (0.002<br>/ 50)  | 0.075 (0.045<br>/ 100) | - (- / 0)              | 0.045 (0.021<br>/ 20) |  |
| Deoxyinosine               | 8.3, 8.2, 6.5,<br>4.2, 3.8, 3.8,<br>2.8, 2.6                        | Singlet, Singlet, Triplet,<br>Multiplet, Quartet, Quar-<br>tet, Multiplet, Multiplet                                               | 0.628 (0.000<br>/ 20)  | 0.232 (0.038<br>/ 30)  | 0.312 (0.000<br>/ 10)  | 0.169 (0.000<br>/ 20)  | 0.145 (0.077<br>/ 50) |  |
| 2-Aminobenzoic<br>acid     | 7.7, 7.3, 6.9,<br>3.8                                               | Quartet, Multiplet, Quar-<br>tet, Multiplet                                                                                        | 0.210 (0.000<br>/ 20)  | 0.183 (0.041<br>/ 70)  | 0.408 (0.102<br>/ 50)  | - (- / 0)              | 0.145 (0.030<br>/ 50) |  |
| Fumaric acid               | 6.5                                                                 | Singlet                                                                                                                            | 0.017 (0.011<br>/ 100) | 0.002 (0.000<br>/ 20)  | 0.014 (0.009<br>/ 90)  | 0.036 (0.016<br>/ 100) | - (- / 0)             |  |
| Uridine                    | 7.9, 5.9, 4.3,<br>4.2, 4.1, 3.9,<br>3.9, 3.8, 3.4                   | Doublet, Triplet, Triplet,<br>Triplet, Multiplet, Doublet,<br>Doublet, Quartet, Singlet                                            | 0.017 (0.000<br>/ 20)  | 0.004 (0.000<br>/ 10)  | 0.032 (0.000<br>/ 20)  | 0.028 (0.000<br>/ 20)  | - (- / 0)             |  |
| Ribose 5-phos-<br>phate    | 5.4, 5.2, 4.3,<br>4.2, 4.1, 3.9                                     | Multiplet, Singlet, Multi-<br>plet, Multiplet, Multiplet,<br>Multiplet                                                             | 2.251 (0.449<br>/ 40)  | 0.956 (0.000<br>/ 10)  | 1.871 (0.712<br>/ 50)  | 2.249 (0.646<br>/ 60)  | - (- / 0)             |  |
| Gallic acid                | 7                                                                   | Singlet                                                                                                                            | - (- / 0)              | 0.015 (0.008<br>/ 50)  | - (- / 0)              | 0.015 (0.001<br>/ 40)  | 0.021 (0.009<br>/ 80) |  |
| Folic acid                 | 8.5, 8.0, 7.5,<br>6.4, 4.3, 4.2,<br>2.3, 2.2, 2.0                   | Singlet, Doublet, Doublet,<br>Doublet, Multiplet, Sin-<br>glet, Multiplet, Multiplet,<br>Multiplet                                 | 0.015 (0.004<br>/ 60)  | - (- / 0)              | 0.016 (0.005<br>/ 70)  | - (- / 0)              | 0.015 (0.000<br>/ 10) |  |
| Suberic acid               | 2.2, 1.5, 1.3                                                       | Triplet, Triplet, Multiplet                                                                                                        | - (- / 0)              | 0.087 (0.011<br>/ 30)  | 0.266 (0.014<br>/ 20)  | - (- / 0)              | 0.116 (0.000<br>/ 10) |  |
| Guanidoacetic<br>acid      | 3.8                                                                 | Singlet                                                                                                                            | - (- / 0)              | 0.199 (0.027<br>/ 20)  | - (- / 0)              | 0.824 (0.089<br>/ 40)  | 0.165 (0.034<br>/ 70) |  |
| Thymidine                  | 7.6, 6.3, 4.5,<br>4.0, 3.8, 3.8,<br>2.4, 2.4, 1.9                   | Doublet, Triplet, Quartet,<br>Multiplet, Quartet, Quar-<br>tet, Quartet, Quartet, Dou-<br>blet                                     | 0.056 (0.000<br>/ 20)  | 0.012 (0.003<br>/ 20)  | - (- / 0)              | - (- / 0)              | 0.006 (0.003<br>/ 70) |  |
| Decanoylcarnitine          | 5.6, 3.8, 3.6,<br>3.6, 3.2, 3.2,<br>2.6, 2.5, 2.4,<br>1.6, 1.3, 0.8 | Multiplet, Quartet, Singlet,<br>Singlet, Singlet, Doublet,<br>Quartet, Quartet, Triplet,<br>Multiplet, Multiplet, Tri-<br>plet     | - (- / 0)              | - (- / 0)              | 0.063 (0.002<br>/ 20)  | 0.028 (0.012<br>/ 80)  | 0.021 (0.005<br>/ 70) |  |
| Aminocaproic<br>acid       | 3.0, 2.2, 1.7,<br>1.6, 1.4                                          | Triplet, Triplet, Multiplet,<br>Multiplet, Multiplet                                                                               | - (- / 0)              | 0.227 (0.051<br>/ 50)  | 0.696 (0.200<br>/ 20)  | - (- / 0)              | 0.126 (0.044<br>/ 40) |  |
| Dihydroorotic<br>acid      | 4.1, 3.0, 3.0,<br>2.8, 2.8                                          | Triplet, Doublet, Doublet,<br>Doublet, Doublet                                                                                     | 1.380 (0.000<br>/ 20)  | 0.225 (0.082<br>/ 20)  | 0.909 (0.808<br>/ 20)  | - (- / 0)              | - (- / 0)             |  |

|                                           |                                                                                |                                                                                                                                     |                    |                    |                    |                     |                    |
|-------------------------------------------|--------------------------------------------------------------------------------|-------------------------------------------------------------------------------------------------------------------------------------|--------------------|--------------------|--------------------|---------------------|--------------------|
| <b>Biocytin</b>                           | 4.6, 4.4, 3.7, 3.3, 3.2, 3.0, 2.8, 2.2, 1.9, 1.6, 1.4                          | Quartet, Multiplet, Triplet, Multiplet, Multiplet, Quartet, Doublet, Triplet, Multiplet, Multiplet, Multiplet                       | - (- / 0)          | 0.200 (0.077 / 30) | 0.749 (0.000 / 10) | - (- / 0)           | 0.066 (0.028 / 50) |
| <b>Propyl alcohol</b>                     | 3.6, 1.5, 0.9                                                                  | Triplet, Multiplet, Triplet                                                                                                         | - (- / 0)          | 0.115 (0.000 / 10) | 0.646 (0.312 / 20) | - (- / 0)           | 0.165 (0.014 / 50) |
| <b>Salicyluric acid</b>                   | 7.8, 7.5, 7.0, 4.0                                                             | Quartet, Multiplet, Quartet, Doublet                                                                                                | - (- / 0)          | 0.030 (0.000 / 10) | 0.026 (0.008 / 20) | - (- / 0)           | 0.015 (0.007 / 30) |
| <b>3,7-Dimethyluric acid</b>              | 3.4, 3.4                                                                       | Singlet, Singlet                                                                                                                    | 0.252 (0.092 / 60) | - (- / 0)          | - (- / 0)          | 0.635 (0.222 / 100) | 0.048 (0.035 / 20) |
| <b>Deoxycholic acid glycine conjugate</b> | 7.8, 4.0, 3.7, 3.6, 2.3, 2.2, 1.8, 1.5, 1.4, 1.3, 1.2, 1.1, 1.0, 0.9, 0.7      | Triplet, Singlet, Multiplet, Multiplet, Multiplet, Multiplet, Multiplet, Triplet, Doublet, Multiplet, Doublet, Singlet, Singlet     | - (- / 0)          | 0.006 (0.003 / 50) | 0.016 (0.009 / 70) | - (- / 0)           | 0.010 (0.005 / 20) |
| <b>Pelargonic acid</b>                    | 2.2, 1.5, 1.3, 0.9                                                             | Triplet, Triplet, Multiplet, Multiplet                                                                                              | - (- / 0)          | 0.055 (0.011 / 20) | 0.091 (0.006 / 20) | - (- / 0)           | 0.057 (0.004 / 20) |
| <b>Glyoxylic acid</b>                     | 9.4, 5.1                                                                       | Singlet, Singlet                                                                                                                    | - (- / 0)          | 0.002 (0.000 / 10) | - (- / 0)          | 0.049 (0.006 / 60)  | 0.072 (0.012 / 90) |
| <b>3-Methyladipic acid</b>                | 2.4, 2.2, 1.9, 1.6, 1.5, 0.9                                                   | Multiplet, Quartet, Multiplet, Multiplet, Multiplet, Doublet                                                                        | 0.534 (0.060 / 60) | - (- / 0)          | 0.692 (0.178 / 50) | 0.305 (0.000 / 20)  | - (- / 0)          |
| <b>Geraniol</b>                           | 5.4, 4.1, 2.1, 1.7, 1.7, 1.6                                                   | Multiplet, Triplet, Multiplet, Doublet, Singlet, Singlet                                                                            | - (- / 0)          | 0.190 (0.012 / 20) | - (- / 0)          | 0.116 (0.037 / 80)  | 0.032 (0.010 / 90) |
| <b>Alpha-Lactose</b>                      | 5.2, 4.4, 3.9, 3.9, 3.8, 3.6, 3.3                                              | Doublet, Doublet, Multiplet, Doublet, Multiplet, Multiplet, Multiplet                                                               | - (- / 0)          | 0.038 (0.019 / 30) | 0.212 (0.008 / 20) | 0.199 (0.000 / 20)  | - (- / 0)          |
| <b>Propanal</b>                           | 9.7, 2.6, 1.0                                                                  | Triplet, Multiplet, Multiplet                                                                                                       | - (- / 0)          | 0.007 (0.002 / 60) | 0.009 (0.000 / 10) | - (- / 0)           | 0.092 (0.000 / 10) |
| <b>1-Butanol</b>                          | 3.6, 1.5, 1.3, 0.9                                                             | Triplet, Multiplet, Multiplet, Triplet                                                                                              | - (- / 0)          | 0.017 (0.000 / 10) | 0.064 (0.006 / 20) | - (- / 0)           | 0.025 (0.007 / 60) |
| <b>Chenodeoxycholic acid</b>              | 3.9, 3.5, 2.2, 2.1, 2.0, 1.9, 1.7, 1.5, 1.4, 1.3, 1.1, 1.0, 1.0, 1.0, 0.9, 0.7 | Doublet, Multiplet, Multiplet, Multiplet, Multiplet, Multiplet, Multiplet, Multiplet, Multiplet, Doublet, Doublet, Triplet, Singlet | - (- / 0)          | 0.097 (0.049 / 90) | 0.201 (0.167 / 90) | - (- / 0)           | 0.085 (0.026 / 80) |
| <b>1-Methyluric acid</b>                  | 3.3                                                                            | Singlet                                                                                                                             | 0.457 (0.000 / 20) | - (- / 0)          | - (- / 0)          | 0.213 (0.128 / 60)  | 0.383 (0.000 / 10) |
| <b>N-Methylhydantoin</b>                  | 4.1, 2.9                                                                       | Singlet, Singlet                                                                                                                    | - (- / 0)          | 0.061 (0.000 / 10) | - (- / 0)          | 0.048 (0.014 / 80)  | 0.044 (0.021 / 80) |
| <b>Xanthurenic acid</b>                   | 7.4, 7.2, 7.0, 6.7                                                             | Quartet, Triplet, Quartet, Singlet                                                                                                  | - (- / 0)          | 0.009 (0.003 / 60) | 0.016 (0.008 / 20) | - (- / 0)           | 0.010 (0.002 / 80) |
| <b>Maltotriose</b>                        | 5.4, 5.2, 3.9, 3.9, 3.8, 3.7, 3.7, 3.6, 3.6, 3.6, 3.4, 3.4, 3.3                | Triplet, Doublet, Multiplet, Quartet, Multiplet, Multiplet, Singlet, Multiplet, Singlet, Singlet, Singlet, Doublet, Quartet         | - (- / 0)          | 0.076 (0.015 / 20) | 0.193 (0.028 / 50) | - (- / 0)           | 0.307 (0.092 / 80) |
| <b>3-Aminoisobutanoic acid</b>            | 3.1, 3.0, 2.9, 2.6, 1.8, 1.2                                                   | Quartet, Quartet, Triplet, Multiplet, Singlet, Doublet                                                                              | - (- / 0)          | 0.596 (0.000 / 10) | - (- / 0)          | 0.330 (0.089 / 60)  | 0.303 (0.000 / 10) |
| <b>Traumatic acid</b>                     | 6.7, 5.8, 5.8, 2.2, 1.5, 1.4, 1.3                                              | Multiplet, Triplet, Triplet, Multiplet, Triplet, Triplet, Doublet                                                                   | 0.027 (0.010 / 80) | 0.007 (0.000 / 10) | 0.021 (0.006 / 50) | - (- / 0)           | - (- / 0)          |
| <b>Carnosine</b>                          | 8.1, 7.1, 4.5, 3.2, 3.2, 3.0, 2.7                                              | Singlet, Singlet, Quartet, Multiplet, Doublet, Quartet, Multiplet                                                                   | - (- / 0)          | 0.016 (0.000 / 10) | - (- / 0)          | 0.014 (0.004 / 60)  | 0.024 (0.013 / 20) |
| <b>Caproic acid</b>                       | 2.2, 1.5, 1.3, 0.9                                                             | Triplet, Multiplet, Multiplet, Triplet                                                                                              | 0.517 (0.000 / 20) | 0.165 (0.048 / 20) | 0.275 (0.114 / 30) | - (- / 0)           | 0.104 (0.015 / 20) |

|                                        |                                                                                     |                                                                                                                                                                                 |                     |                    |                    |                     |                    |
|----------------------------------------|-------------------------------------------------------------------------------------|---------------------------------------------------------------------------------------------------------------------------------------------------------------------------------|---------------------|--------------------|--------------------|---------------------|--------------------|
| <b>Anserine</b>                        | 8.3, 7.1, 4.5, 3.8, 3.2, 3.0, 2.7                                                   | Doublet, Doublet, Quartet, Singlet, Multiplet, Quartet, Multiplet                                                                                                               | - (- / 0)           | 0.028 (0.000 / 10) | - (- / 0)          | 0.070 (0.041 / 100) | 0.069 (0.018 / 30) |
| <b>Niacinamide</b>                     | 8.9, 8.7, 8.2, 8.2, 7.6, 7.4                                                        | Doublet, Quartet, Multiplet, Multiplet, Multiplet, Multiplet                                                                                                                    | 0.027 (0.025 / 100) | - (- / 0)          | 0.020 (0.015 / 30) | - (- / 0)           | 0.147 (0.138 / 20) |
| <b>Glycerol</b>                        | 3.8, 3.6, 3.6                                                                       | Multiplet, Quartet, Quartet, Quartet                                                                                                                                            | 0.639 (0.000 / 20)  | 0.280 (0.000 / 10) | 1.744 (0.344 / 30) | - (- / 0)           | - (- / 0)          |
| <b>Norleucine</b>                      | 3.7, 1.9, 1.4, 0.9                                                                  | Quartet, Multiplet, Multiplet, Triplet                                                                                                                                          | - (- / 0)           | 2.509 (0.361 / 20) | 5.294 (0.014 / 20) | - (- / 0)           | 1.647 (0.444 / 30) |
| <b>Ethylmethylacetic acid</b>          | 2.3, 1.5, 1.1, 0.9                                                                  | Multiplet, Multiplet, Doublet, Triplet                                                                                                                                          | - (- / 0)           | - (- / 0)          | 0.279 (0.118 / 50) | 0.116 (0.015 / 40)  | 0.019 (0.000 / 10) |
| <b>Quinolinic acid</b>                 | 8.4, 8.0, 7.4                                                                       | Quartet, Quartet, Quartet                                                                                                                                                       | - (- / 0)           | 0.012 (0.002 / 40) | 0.014 (0.003 / 30) | - (- / 0)           | 0.015 (0.003 / 50) |
| <b>Quinic acid</b>                     | 4.1, 4.0, 3.5, 2.0, 2.0, 1.9, 1.9, 1.8                                              | Quartet, Multiplet, Quartet, Multiplet, Multiplet, Singlet, Doublet, Singlet                                                                                                    | 1.043 (0.000 / 20)  | - (- / 0)          | - (- / 0)          | 0.259 (0.208 / 80)  | 0.095 (0.009 / 20) |
| <b>Isoleucine</b>                      | 3.7, 2.0, 1.5, 1.2, 1.0, 0.9                                                        | Doublet, Multiplet, Multiplet, Multiplet, Doublet, Triplet                                                                                                                      | 1.015 (0.000 / 20)  | 0.061 (0.014 / 70) | 0.156 (0.053 / 90) | 0.974 (0.000 / 20)  | 0.054 (0.014 / 80) |
| <b>4-Heptanone</b>                     | 2.5, 1.5, 0.9                                                                       | Triplet, Doublet, Triplet                                                                                                                                                       | 0.832 (0.000 / 20)  | 0.249 (0.058 / 50) | 0.493 (0.039 / 30) | - (- / 0)           | 0.005 (0.000 / 10) |
| <b>Glycylproline</b>                   | 4.3, 4.3, 3.9, 3.9, 3.6, 3.6, 3.6, 3.5, 3.5, 2.3, 2.2, 2.1, 2.0, 2.0, 1.9, 1.9, 1.8 | Quartet, Quartet, Singlet, Doublet, Doublet, Multiplet, Multiplet | 0.151 (0.000 / 20)  | 0.146 (0.042 / 90) | - (- / 0)          | - (- / 0)           | 0.091 (0.036 / 90) |
| <b>Choline</b>                         | 4.1, 3.5, 3.2                                                                       | Multiplet, Multiplet, Singlet                                                                                                                                                   | - (- / 0)           | 0.019 (0.005 / 30) | - (- / 0)          | 0.024 (0.006 / 40)  | 0.007 (0.005 / 30) |
| <b>Phenyllactic acid</b>               | 7.4, 7.3, 4.3, 3.1, 3.1, 2.9                                                        | Multiplet, Multiplet, Quartet, Doublet, Doublet, Quartet                                                                                                                        | - (- / 0)           | 0.022 (0.000 / 10) | 0.080 (0.000 / 10) | 0.051 (0.000 / 20)  | - (- / 0)          |
| <b>Inosinic acid</b>                   | 8.6, 8.2, 6.1, 4.5, 4.4, 4.0                                                        | Singlet, Singlet, Doublet, Triplet, Multiplet, Multiplet                                                                                                                        | - (- / 0)           | 0.004 (0.000 / 10) | - (- / 0)          | 0.005 (0.000 / 20)  | 0.027 (0.023 / 20) |
| <b>Methylglutaric acid</b>             | 2.2, 2.0, 0.9                                                                       | Multiplet, Multiplet, Doublet                                                                                                                                                   | - (- / 0)           | 0.140 (0.000 / 10) | 0.305 (0.000 / 10) | - (- / 0)           | 0.008 (0.000 / 10) |
| <b>Tyrosine</b>                        | 7.2, 6.9, 3.9, 3.2, 3.0                                                             | Quartet, Quartet, Quartet, Quartet, Quartet                                                                                                                                     | - (- / 0)           | 0.328 (0.103 / 20) | - (- / 0)          | 0.843 (0.000 / 20)  | 0.358 (0.151 / 20) |
| <b>3,4-Dihydroxyhydrocinnamic acid</b> | 6.9, 6.8, 6.7, 3.9, 3.2, 3.1, 3.0                                                   | Doublet, Doublet, Quartet, Quartet, Doublet, Doublet, Quartet                                                                                                                   | 0.392 (0.000 / 20)  | - (- / 0)          | - (- / 0)          | 0.141 (0.000 / 20)  | 0.098 (0.018 / 30) |
| <b>5-Hydroxylysine</b>                 | 3.9, 3.8, 3.2, 2.9, 2.0, 1.9, 1.7, 1.6                                              | Multiplet, Multiplet, Multiplet, Multiplet, Multiplet, Multiplet, Multiplet                                                                                                     | 0.119 (0.028 / 40)  | 0.032 (0.011 / 60) | 0.075 (0.051 / 80) | - (- / 0)           | - (- / 0)          |
| <b>myo-Inositol</b>                    | 4.1, 3.6, 3.5, 3.3                                                                  | Triplet, Triplet, Quartet, Triplet                                                                                                                                              | 0.200 (0.006 / 40)  | - (- / 0)          | - (- / 0)          | 0.077 (0.000 / 20)  | 0.027 (0.004 / 20) |
| <b>Gentisic acid</b>                   | 7.3, 7.0, 6.8                                                                       | Doublet, Quartet, Doublet                                                                                                                                                       | - (- / 0)           | 0.014 (0.000 / 10) | 0.011 (0.000 / 10) | - (- / 0)           | 0.019 (0.007 / 20) |
| <b>N-Acetyl-L-phenylalanine</b>        | 7.9, 7.4, 7.3, 3.2, 2.9, 1.9                                                        | Doublet, Multiplet, Multiplet, Quartet, Quartet, Singlet                                                                                                                        | - (- / 0)           | 0.026 (0.000 / 10) | 0.054 (0.010 / 30) | - (- / 0)           | 0.022 (0.006 / 20) |
| <b>Ribitol</b>                         | 3.8, 3.7, 3.7                                                                       | Multiplet, Doublet, Multiplet                                                                                                                                                   | 0.550 (0.001 / 40)  | - (- / 0)          | 0.367 (0.050 / 40) | 0.307 (0.000 / 20)  | - (- / 0)          |
| <b>4-Aminohippuric acid</b>            | 7.7, 6.9, 3.9                                                                       | Doublet, Doublet, Doublet                                                                                                                                                       | - (- / 0)           | 0.007 (0.000 / 10) | 0.012 (0.005 / 20) | - (- / 0)           | 0.004 (0.000 / 10) |
| <b>Cysteine</b>                        | 3.9, 3.1, 3.0                                                                       | Quartet, Quartet, Quartet                                                                                                                                                       | 0.086 (0.000 / 20)  | 0.174 (0.000 / 10) | 0.323 (0.000 / 10) | - (- / 0)           | - (- / 0)          |

|                                       |                                                                           |                                                                                                                                     |                    |                    |                    |                     |                    |
|---------------------------------------|---------------------------------------------------------------------------|-------------------------------------------------------------------------------------------------------------------------------------|--------------------|--------------------|--------------------|---------------------|--------------------|
| <b>Acetoacetic acid</b>               | 3.4, 2.3                                                                  | Singlet, Singlet                                                                                                                    | 0.332 (0.000 / 20) | - (- / 0)          | 0.154 (0.000 / 10) | 0.115 (0.048 / 100) | 0.032 (0.007 / 30) |
| <b>1-Methyladenine</b>                | 8.4, 8.3, 3.9                                                             | Singlet, Singlet, Singlet                                                                                                           | - (- / 0)          | 0.010 (0.002 / 30) | - (- / 0)          | 0.012 (0.002 / 80)  | 0.010 (0.005 / 20) |
| <b>Dopamine</b>                       | 6.9, 6.8, 6.7, 3.2, 2.9                                                   | Doublet, Doublet, Quartet, Triplet, Triplet                                                                                         | 0.098 (0.082 / 40) | 0.021 (0.007 / 50) | - (- / 0)          | 0.082 (0.000 / 20)  | 0.016 (0.003 / 30) |
| <b>Pyridoxamine</b>                   | 7.6, 4.3, 2.5                                                             | Singlet, Singlet, Singlet                                                                                                           | 0.220 (0.000 / 20) | - (- / 0)          | - (- / 0)          | 0.068 (0.023 / 40)  | 0.065 (0.042 / 60) |
| <b>Urea</b>                           | 5.8                                                                       | Singlet                                                                                                                             | - (- / 0)          | 0.147 (0.020 / 30) | 0.237 (0.010 / 20) | - (- / 0)           | 0.423 (0.079 / 30) |
| <b>4-Guanidinobutanoic acid</b>       | 3.2, 2.2, 1.8                                                             | Triplet, Triplet, Multiplet                                                                                                         | - (- / 0)          | 0.315 (0.000 / 10) | - (- / 0)          | - (- / 0)           | 0.041 (0.007 / 20) |
| <b>Lysine</b>                         | 3.8, 3.0, 1.9, 1.9, 1.7, 1.5, 1.4                                         | Triplet, Triplet, Multiplet, Multiplet, Multiplet, Multiplet                                                                        | - (- / 0)          | 0.024 (0.006 / 40) | - (- / 0)          | - (- / 0)           | 0.045 (0.036 / 90) |
| <b>N-Acetylputrescine</b>             | 3.2, 3.0, 2.0, 1.7, 1.6                                                   | Triplet, Triplet, Singlet, Multiplet, Multiplet                                                                                     | 0.009 (0.000 / 20) | - (- / 0)          | - (- / 0)          | - (- / 0)           | 0.019 (0.018 / 40) |
| <b>Mannitol</b>                       | 3.9, 3.8, 3.8, 3.7                                                        | Quartet, Doublet, Multiplet, Quartet                                                                                                | - (- / 0)          | 0.294 (0.081 / 40) | - (- / 0)          | - (- / 0)           | 0.350 (0.000 / 10) |
| <b>Acetylcysteine</b>                 | 4.4, 2.9, 2.1                                                             | Multiplet, Multiplet, Singlet                                                                                                       | - (- / 0)          | - (- / 0)          | - (- / 0)          | 0.073 (0.015 / 40)  | 0.043 (0.013 / 60) |
| <b>Ethanolamine</b>                   | 3.8, 3.1                                                                  | Triplet, Triplet                                                                                                                    | - (- / 0)          | - (- / 0)          | - (- / 0)          | 0.027 (0.019 / 60)  | 0.008 (0.000 / 10) |
| <b>Creatine</b>                       | 3.9, 3.0                                                                  | Singlet, Singlet                                                                                                                    | - (- / 0)          | 0.012 (0.002 / 60) | - (- / 0)          | - (- / 0)           | 0.008 (0.003 / 70) |
| <b>1,11-Undecanedicarboxylic acid</b> | 2.2, 1.5, 1.3                                                             | Triplet, Multiplet, Singlet                                                                                                         | 0.307 (0.127 / 60) | - (- / 0)          | - (- / 0)          | - (- / 0)           | 0.064 (0.000 / 10) |
| <b>Vanillylmandelic acid</b>          | 7.1, 6.9, 3.9                                                             | Doublet, Multiplet, Singlet                                                                                                         | - (- / 0)          | - (- / 0)          | - (- / 0)          | 0.091 (0.016 / 80)  | 0.039 (0.023 / 70) |
| <b>Asparagine</b>                     | 4.0, 3.0, 2.9, 2.8                                                        | Quartet, Doublet, Doublet, Quartet                                                                                                  | - (- / 0)          | - (- / 0)          | 0.105 (0.000 / 10) | - (- / 0)           | 0.031 (0.000 / 10) |
| <b>Galactonic acid</b>                | 4.2, 4.0, 3.7, 3.6                                                        | Doublet, Multiplet, Triplet, Quartet                                                                                                | - (- / 0)          | 0.350 (0.157 / 20) | - (- / 0)          | 1.209 (0.000 / 20)  | 0.673 (0.091 / 20) |
| <b>Allothreonine</b>                  | 4.4, 3.8, 1.2                                                             | Multiplet, Doublet, Doublet                                                                                                         | - (- / 0)          | 0.142 (0.000 / 10) | - (- / 0)          | - (- / 0)           | 0.049 (0.002 / 20) |
| <b>Glycocholic acid</b>               | 4.0, 3.9, 3.5, 2.4, 2.2, 2.1, 2.0, 1.9, 1.7, 1.6, 1.3, 1.1, 1.0, 0.9, 0.7 | Singlet, Singlet, Multiplet, Multiplet, Multiplet, Multiplet, Singlet, Multiplet, Multiplet, Multiplet, Multiplet, Singlet, Singlet | - (- / 0)          | 0.009 (0.006 / 30) | 0.014 (0.010 / 40) | - (- / 0)           | - (- / 0)          |
| <b>Octanal</b>                        | 9.7, 2.5, 0.9                                                             | Triplet, Multiplet, Triplet                                                                                                         | - (- / 0)          | 1.623 (0.000 / 10) | - (- / 0)          | - (- / 0)           | 1.602 (0.000 / 10) |
| <b>Leucinic acid</b>                  | 4.3, 1.8, 1.6, 0.9                                                        | Quartet, Multiplet, Multiplet, Quartet                                                                                              | - (- / 0)          | - (- / 0)          | 0.172 (0.000 / 10) | - (- / 0)           | 0.018 (0.000 / 10) |
| <b>Hippuric acid</b>                  | 7.8, 7.6, 7.5, 4.0                                                        | Multiplet, Multiplet, Multiplet, Doublet                                                                                            | 0.019 (0.000 / 20) | - (- / 0)          | 0.014 (0.000 / 10) | - (- / 0)           | - (- / 0)          |
| <b>Isopropyl alcohol</b>              | 4.0, 1.2                                                                  | Multiplet, Doublet                                                                                                                  | - (- / 0)          | 0.017 (0.000 / 10) | 0.029 (0.000 / 10) | - (- / 0)           | - (- / 0)          |
| <b>3-Hydroxybutyric acid</b>          | 4.2, 2.4, 2.3, 1.2                                                        | Doublet, Quartet, Quartet, Doublet                                                                                                  | - (- / 0)          | - (- / 0)          | 0.795 (0.000 / 10) | - (- / 0)           | 0.416 (0.000 / 10) |
| <b>Undecanoic acid</b>                | 2.1, 1.5, 1.3, 0.8                                                        | Triplet, Triplet, Multiplet, Triplet                                                                                                | - (- / 0)          | 0.057 (0.000 / 10) | - (- / 0)          | - (- / 0)           | 0.384 (0.000 / 10) |
| <b>2-Piperidinone</b>                 | 3.3, 2.3, 1.8                                                             | Multiplet, Triplet, Multiplet                                                                                                       | - (- / 0)          | 0.043 (0.000 / 10) | 0.060 (0.000 / 10) | - (- / 0)           | - (- / 0)          |
| <b>Agmatine</b>                       | 3.2, 3.0, 1.7                                                             | Triplet, Triplet, Multiplet                                                                                                         | - (- / 0)          | - (- / 0)          | - (- / 0)          | 0.382 (0.000 / 20)  | 0.245 (0.000 / 10) |
| <b>2-Furoic acid</b>                  | 7.6, 7.0, 6.5                                                             | Quartet, Quartet, Quartet                                                                                                           | 0.051 (0.000 / 20) | - (- / 0)          | - (- / 0)          | - (- / 0)           | 0.009 (0.000 / 20) |
| <b>Deoxyguanosine</b>                 | 8.0, 6.3, 4.6, 4.1, 3.8, 3.8, 2.8, 2.5                                    | Singlet, Triplet, Multiplet, Quartet, Quartet, Quartet, Multiplet, Multiplet                                                        | - (- / 0)          | 0.025 (0.003 / 30) | - (- / 0)          | - (- / 0)           | 0.026 (0.003 / 40) |

|                                           |                                                                                  |                                                                                                                                                |                       |                        |                       |                       |                       |
|-------------------------------------------|----------------------------------------------------------------------------------|------------------------------------------------------------------------------------------------------------------------------------------------|-----------------------|------------------------|-----------------------|-----------------------|-----------------------|
| <b>Alloisoleucine</b>                     | 3.7, 2.1, 1.4,<br>1.3, 0.9                                                       | Doublet, Multiplet, Multi-<br>plet, Multiplet, Multiplet                                                                                       | 0.215 (0.000<br>/ 20) | 0.063 (0.000<br>/ 10)  | - (- / 0)             | 0.226 (0.000<br>/ 20) | 0.005 (0.000<br>/ 10) |
| <b>D-Alpha-amino-<br/>butyric acid</b>    | 3.7, 1.9, 1.0                                                                    | Triplet, Multiplet, Triplet                                                                                                                    | - (- / 0)             | - (- / 0)              | 0.176 (0.141<br>/ 20) | - (- / 0)             | 0.054 (0.000<br>/ 10) |
| <b>Oxoglutaric acid</b>                   | 3.0, 2.4                                                                         | Triplet, Triplet                                                                                                                               | - (- / 0)             | - (- / 0)              | 0.215 (0.000<br>/ 10) | 0.197 (0.000<br>/ 20) | 0.092 (0.000<br>/ 10) |
| <b>Protocatechuic<br/>acid</b>            | 7.4, 7.4, 6.9                                                                    | Doublet, Quartet, Doublet                                                                                                                      | - (- / 0)             | 0.016 (0.000<br>/ 10)  | - (- / 0)             | 0.014 (0.002<br>/ 40) | - (- / 0)             |
| <b>Butanal</b>                            | 9.7, 2.5, 1.6,<br>0.9                                                            | Triplet, Multiplet, Multi-<br>plet, Multiplet                                                                                                  | - (- / 0)             | 0.614 (0.000<br>/ 10)  | - (- / 0)             | 0.525 (0.000<br>/ 20) | - (- / 0)             |
| <b>Dihydrouracil</b>                      | 3.4, 2.7                                                                         | Triplet, Triplet                                                                                                                               | - (- / 0)             | 0.066 (0.000<br>/ 10)  | - (- / 0)             | - (- / 0)             | 0.003 (0.000<br>/ 10) |
| <b>6-Hydroxynico-<br/>tinic acid</b>      | 8.1, 6.6                                                                         | Multiplet, Quartet                                                                                                                             | - (- / 0)             | - (- / 0)              | 0.064 (0.000<br>/ 10) | - (- / 0)             | 0.039 (0.000<br>/ 10) |
| <b>Taurine</b>                            | 3.4, 3.3                                                                         | Triplet, Triplet                                                                                                                               | - (- / 0)             | - (- / 0)              | - (- / 0)             | 0.039 (0.000<br>/ 20) | 0.006 (0.000<br>/ 10) |
| <b>Saccharopine</b>                       | 3.7, 3.6, 3.0,<br>2.4, 2.1, 1.9,<br>1.8, 1.5                                     | Quartet, Triplet, Multiplet,<br>Multiplet, Multiplet, Multi-<br>plet, Multiplet, Multiplet                                                     | - (- / 0)             | - (- / 0)              | - (- / 0)             | 0.728 (0.000<br>/ 20) | 0.481 (0.371<br>/ 20) |
| <b>Citrulline</b>                         | 3.8, 3.1, 1.9,<br>1.6                                                            | Triplet, Multiplet, Multi-<br>plet, Multiplet                                                                                                  | - (- / 0)             | - (- / 0)              | - (- / 0)             | 0.046 (0.000<br>/ 20) | 0.061 (0.000<br>/ 10) |
| <b>Maleic acid</b>                        | 6.1                                                                              | Singlet                                                                                                                                        | - (- / 0)             | 0.001 (0.000<br>/ 10)  | - (- / 0)             | - (- / 0)             | 0.439 (0.000<br>/ 10) |
| <b>O-Phosphoethan-<br/>olamine</b>        | 4.0, 3.2                                                                         | Multiplet, Triplet                                                                                                                             | - (- / 0)             | - (- / 0)              | - (- / 0)             | 0.108 (0.000<br>/ 20) | 0.015 (0.000<br>/ 10) |
| <b>2-Hydroxycaproic<br/>acid</b>          | 4.0, 1.7, 1.6,<br>1.3, 0.9                                                       | Quartet, Multiplet, Multi-<br>plet, Multiplet, Triplet                                                                                         | - (- / 0)             | - (- / 0)              | 0.258 (0.000<br>/ 10) | - (- / 0)             | 0.031 (0.000<br>/ 10) |
| <b>Glycolic acid</b>                      | 3.9                                                                              | Singlet                                                                                                                                        | - (- / 0)             | 0.007 (0.002<br>/ 100) | - (- / 0)             | - (- / 0)             | 0.011 (0.003<br>/ 90) |
| <b>Gamma-Glu-<br/>tamylcysteine</b>       | 4.6, 3.9, 3.0,<br>2.5, 2.2                                                       | Multiplet, Triplet, Multi-<br>plet, Multiplet, Multiplet                                                                                       | - (- / 0)             | 0.026 (0.000<br>/ 20)  | - (- / 0)             | - (- / 0)             | 0.006 (0.000<br>/ 10) |
| <b>Dimethylamine</b>                      | 2.5                                                                              | Singlet                                                                                                                                        | - (- / 0)             | - (- / 0)              | - (- / 0)             | 0.012 (0.003<br>/ 80) | 0.004 (0.000<br>/ 10) |
| <b>Guaiacol</b>                           | 6.9, 6.9, 3.9                                                                    | Multiplet, Multiplet, Sin-<br>glet                                                                                                             | - (- / 0)             | 0.062 (0.024<br>/ 40)  | - (- / 0)             | - (- / 0)             | 0.064 (0.026<br>/ 50) |
| <b>Ethyl isopropyl<br/>ketone</b>         | 2.8, 2.6, 1.0,<br>1.0                                                            | Multiplet, Quartet, Dou-<br>blet, Triplet                                                                                                      | - (- / 0)             | 0.733 (0.204<br>/ 60)  | 1.546 (0.890<br>/ 70) | - (- / 0)             | - (- / 0)             |
| <b>Delta-Hexanolac-<br/>tone</b>          | 4.6, 3.8, 2.6,<br>2.5, 2.2, 2.0,<br>1.9, 1.5, 1.3,<br>1.2                        | Multiplet, Multiplet, Multi-<br>plet, Multiplet, Triplet,<br>Multiplet, Multiplet, Multi-<br>plet, Doublet, Doublet                            | - (- / 0)             | 0.236 (0.207<br>/ 20)  | 1.011 (0.000<br>/ 10) | - (- / 0)             | - (- / 0)             |
| <b>(S)-3-Hydroxyiso-<br/>butyric acid</b> | 3.7, 2.6, 1.1                                                                    | Multiplet, Multiplet, Dou-<br>blet                                                                                                             | - (- / 0)             | - (- / 0)              | 0.034 (0.005<br>/ 20) | 0.055 (0.012<br>/ 40) | - (- / 0)             |
| <b>Citraconic acid</b>                    | 5.6, 2.0                                                                         | Doublet, Doublet                                                                                                                               | - (- / 0)             | - (- / 0)              | - (- / 0)             | 0.107 (0.000<br>/ 20) | 0.033 (0.011<br>/ 50) |
| <b>Fructose</b>                           | 4.1, 4.1, 4.0,<br>4.0, 3.9, 3.8,<br>3.8, 3.8, 3.7,<br>3.7, 3.7, 3.6,<br>3.6, 3.5 | Quartet, Quartet, Quartet,<br>Multiplet, Quartet, Multi-<br>plet, Quartet, Doublet,<br>Doublet, Quartet, Quartet,<br>Doublet, Doublet, Doublet | - (- / 0)             | 3.931 (0.512<br>/ 20)  | - (- / 0)             | - (- / 0)             | 2.705 (1.244<br>/ 60) |
| <b>Fucose</b>                             | 5.2, 4.6, 4.2,<br>3.9, 3.8, 3.6,<br>3.5, 1.3, 1.2                                | Doublet, Doublet, Quartet,<br>Quartet, Multiplet, Quar-<br>tet, Quartet, Doublet, Dou-<br>blet                                                 | 0.214 (0.000<br>/ 20) | 0.029 (0.025<br>/ 40)  | 0.034 (0.020<br>/ 20) | - (- / 0)             | - (- / 0)             |
| <b>Dihydrothymine</b>                     | 3.5, 3.2, 3.2,<br>3.2, 2.8, 1.2                                                  | Quartet, Singlet, Doublet,<br>Singlet, Multiplet, Doublet                                                                                      | - (- / 0)             | 0.146 (0.000<br>/ 10)  | - (- / 0)             | - (- / 0)             | 0.030 (0.003<br>/ 20) |
| <b>o-Tyrosine</b>                         | 7.2, 6.9, 4.0,<br>3.3, 3.3, 3.0                                                  | Multiplet, Multiplet, Quar-<br>tet, Doublet, Doublet,<br>Quartet                                                                               | - (- / 0)             | 0.114 (0.051<br>/ 30)  | - (- / 0)             | - (- / 0)             | 0.082 (0.059<br>/ 60) |
| <b>Arabitol</b>                           | 3.9, 3.8, 3.7,<br>3.7, 3.6                                                       | Multiplet, Quartet, Multi-<br>plet, Multiplet, Quartet                                                                                         | - (- / 0)             | 0.342 (0.000<br>/ 10)  | - (- / 0)             | - (- / 0)             | 0.154 (0.000<br>/ 10) |

|                                 |                                                            |                                                                                                                |                    |                    |                    |                    |                    |
|---------------------------------|------------------------------------------------------------|----------------------------------------------------------------------------------------------------------------|--------------------|--------------------|--------------------|--------------------|--------------------|
| <b>Benzoic acid</b>             | 7.9, 7.5, 7.5                                              | Multiplet, Multiplet, Triplet                                                                                  | - (- / 0)          | - (- / 0)          | 0.028 (0.000 / 10) | - (- / 0)          | 0.007 (0.000 / 10) |
| <b>Aminoadipic acid</b>         | 3.9, 3.7, 2.3, 2.2, 2.1, 1.8, 1.6                          | Multiplet, Quartet, Multiplet, Multiplet, Multiplet, Multiplet                                                 | 0.224 (0.000 / 20) | - (- / 0)          | - (- / 0)          | - (- / 0)          | - (- / 0)          |
| <b>Octanoylcarnitine</b>        | 5.6, 3.9, 3.6, 3.6, 3.2, 2.7, 2.7, 2.6, 2.4, 1.6, 1.3, 0.8 | Quartet, Quartet, Singlet, Singlet, Singlet, Doublet, Doublet, Quartet, Multiplet, Triplet, Multiplet, Triplet | 0.802 (0.000 / 20) | - (- / 0)          | - (- / 0)          | - (- / 0)          | - (- / 0)          |
| <b>Hexa-noylcarnitine</b>       | 5.6, 3.9, 3.6, 3.6, 3.2, 2.6, 2.6, 2.5, 1.6, 1.3, 0.9      | Quartet, Quartet, Singlet, Singlet, Singlet, Doublet, Doublet, Multiplet, Multiplet, Multiplet, Triplet        | - (- / 0)          | 0.001 (0.000 / 10) | - (- / 0)          | 0.049 (0.000 / 20) | - (- / 0)          |
| <b>Homocitrulline</b>           | 6.3, 3.7, 3.1, 1.9, 1.5, 1.4, 1.4                          | Singlet, Quartet, Quartet, Multiplet, Multiplet, Multiplet                                                     | - (- / 0)          | 0.018 (0.002 / 20) | - (- / 0)          | - (- / 0)          | - (- / 0)          |
| <b>1-Hexadecanol</b>            | 3.5, 1.5, 1.3, 0.9                                         | Triplet, Multiplet, Multiplet, Triplet                                                                         | - (- / 0)          | 0.062 (0.000 / 10) | - (- / 0)          | - (- / 0)          | - (- / 0)          |
| <b>Azelaic acid</b>             | 2.2, 1.5, 1.3                                              | Triplet, Multiplet, Multiplet                                                                                  | - (- / 0)          | 0.147 (0.000 / 10) | - (- / 0)          | - (- / 0)          | - (- / 0)          |
| <b>Gamma-Amino-butyric acid</b> | 3.0, 2.3, 1.9                                              | Triplet, Triplet, Multiplet                                                                                    | - (- / 0)          | - (- / 0)          | 0.161 (0.000 / 10) | - (- / 0)          | - (- / 0)          |
| <b>5-Aminopentanoic acid</b>    | 3.0, 2.2, 1.6                                              | Triplet, Triplet, Multiplet                                                                                    | - (- / 0)          | - (- / 0)          | 0.196 (0.033 / 20) | - (- / 0)          | - (- / 0)          |
| <b>Ethylmalonic acid</b>        | 3.0, 1.7, 0.9                                              | Triplet, Multiplet, Triplet                                                                                    | - (- / 0)          | - (- / 0)          | 0.202 (0.030 / 20) | - (- / 0)          | - (- / 0)          |
| <b>Ketoleucine</b>              | 2.7, 2.1, 0.9                                              | Doublet, Multiplet, Doublet                                                                                    | - (- / 0)          | - (- / 0)          | 0.519 (0.000 / 10) | - (- / 0)          | - (- / 0)          |
| <b>2-Hydroxyadipic acid</b>     | 4.1, 2.4, 1.7                                              | Quartet, Multiplet, Multiplet                                                                                  | - (- / 0)          | - (- / 0)          | 0.248 (0.000 / 10) | - (- / 0)          | - (- / 0)          |
| <b>3-Hexanone</b>               | 2.5, 1.6, 1.0, 0.9                                         | Multiplet, Multiplet, Quartet, Triplet                                                                         | - (- / 0)          | - (- / 0)          | 1.178 (0.000 / 10) | - (- / 0)          | - (- / 0)          |
| <b>Glyceric acid</b>            | 4.1, 3.8, 3.7                                              | Quartet, Quartet, Quartet                                                                                      | - (- / 0)          | - (- / 0)          | 0.099 (0.000 / 10) | - (- / 0)          | - (- / 0)          |
| <b>Iditol</b>                   | 3.8, 3.7, 3.6                                              | Multiplet, Multiplet, Quartet                                                                                  | - (- / 0)          | - (- / 0)          | - (- / 0)          | 1.309 (0.000 / 20) | - (- / 0)          |
| <b>Xylitol</b>                  | 3.8, 3.8, 3.7, 3.7, 3.7, 3.6, 3.6                          | Multiplet, Multiplet, Doublet, Doublet, Doublet, Triplet, Doublet                                              | - (- / 0)          | - (- / 0)          | - (- / 0)          | 0.006 (0.000 / 20) | - (- / 0)          |
| <b>Levulinic acid</b>           | 2.8, 2.4, 2.2                                              | Triplet, Triplet, Singlet                                                                                      | - (- / 0)          | - (- / 0)          | - (- / 0)          | 1.590 (0.000 / 20) | - (- / 0)          |
| <b>Acetamide</b>                | 7.5, 6.8, 2.0                                              | Singlet, Singlet, Singlet                                                                                      | - (- / 0)          | - (- / 0)          | - (- / 0)          | 0.655 (0.000 / 20) | - (- / 0)          |
| <b>Glucaric acid</b>            | 4.1, 4.1, 4.1, 3.9                                         | Doublet, Doublet, Quartet, Triplet                                                                             | - (- / 0)          | - (- / 0)          | - (- / 0)          | 0.042 (0.000 / 20) | - (- / 0)          |
| <b>Guanine</b>                  | 7.7                                                        | Singlet                                                                                                        | - (- / 0)          | - (- / 0)          | - (- / 0)          | 0.074 (0.000 / 20) | 0.014 (0.002 / 40) |
| <b>Dihydroxyacetone</b>         | 4.4                                                        | Singlet                                                                                                        | - (- / 0)          | - (- / 0)          | - (- / 0)          | - (- / 0)          | 0.020 (0.005 / 60) |
| <b>Diethanolamine</b>           | 3.9, 3.2                                                   | Triplet, Quartet                                                                                               | - (- / 0)          | - (- / 0)          | - (- / 0)          | - (- / 0)          | 0.131 (0.088 / 20) |
| <b>Serine</b>                   | 4.0, 3.9, 3.8                                              | Quartet, Quartet, Quartet                                                                                      | - (- / 0)          | - (- / 0)          | - (- / 0)          | - (- / 0)          | 0.009 (0.003 / 30) |
| <b>Propylene glycol</b>         | 3.9, 3.5, 3.4, 1.1                                         | Multiplet, Quartet, Quartet, Doublet                                                                           | - (- / 0)          | - (- / 0)          | - (- / 0)          | - (- / 0)          | 0.008 (0.003 / 40) |
| <b>Cyclohexanone</b>            | 2.4, 1.9, 1.7                                              | Triplet, Multiplet, Multiplet                                                                                  | - (- / 0)          | - (- / 0)          | - (- / 0)          | - (- / 0)          | 0.084 (0.000 / 10) |
| <b>Diaminopimelic acid</b>      | 3.8, 3.8, 1.9, 1.5                                         | Triplet, Quartet, Multiplet, Multiplet                                                                         | - (- / 0)          | - (- / 0)          | - (- / 0)          | - (- / 0)          | 0.045 (0.000 / 10) |
| <b>Homocysteine</b>             | 3.9, 2.7, 2.1                                              | Quartet, Multiplet, Multiplet                                                                                  | - (- / 0)          | - (- / 0)          | - (- / 0)          | - (- / 0)          | 0.083 (0.000 / 10) |

|                             |                                   |                                                     |           |           |           |           |                    |
|-----------------------------|-----------------------------------|-----------------------------------------------------|-----------|-----------|-----------|-----------|--------------------|
| <b>Homoserine</b>           | 3.9, 3.8, 2.1, 2.0                | Quartet, Multiplet, Multiplet, Multiplet            | - (- / 0) | - (- / 0) | - (- / 0) | - (- / 0) | 0.021 (0.000 / 10) |
| <b>Heptanoic acid</b>       | 2.2, 1.5, 1.3, 0.9                | Triplet, Multiplet, Multiplet, Triplet              | - (- / 0) | - (- / 0) | - (- / 0) | - (- / 0) | 0.187 (0.070 / 50) |
| <b>Gamma-Caprolactone</b>   | 4.7, 2.6, 2.4, 1.9, 1.8, 1.7, 0.9 | Multiplet, Multiplet, Multiplet, Multiplet, Triplet | - (- / 0) | - (- / 0) | - (- / 0) | - (- / 0) | 0.041 (0.000 / 10) |
| <b>Benzaldehyde</b>         | 9.9, 8.0, 7.8, 7.6                | Singlet, Quartet, Singlet, Triplet                  | - (- / 0) | - (- / 0) | - (- / 0) | - (- / 0) | 0.128 (0.000 / 10) |
| <b>2,3-Butanediol</b>       | 3.7, 3.6, 1.1                     | Multiplet, Multiplet, Multiplet                     | - (- / 0) | - (- / 0) | - (- / 0) | - (- / 0) | 0.035 (0.000 / 10) |
| <b>Isocitric acid</b>       | 4.0, 3.0, 2.5, 2.4                | Doublet, Multiplet, Quartet, Quartet                | - (- / 0) | - (- / 0) | - (- / 0) | - (- / 0) | 0.030 (0.000 / 10) |
| <b>Spermidine</b>           | 2.6, 1.6, 1.5                     | Multiplet, Multiplet, Multiplet                     | - (- / 0) | - (- / 0) | - (- / 0) | - (- / 0) | 0.049 (0.000 / 10) |
| <b>Cytosine</b>             | 7.5, 6.0                          | Doublet, Doublet                                    | - (- / 0) | - (- / 0) | - (- / 0) | - (- / 0) | 0.014 (0.000 / 10) |
| <b>Glycerol 3-phosphate</b> | 3.8, 3.7, 3.6                     | Multiplet, Quartet, Quartet                         | - (- / 0) | - (- / 0) | - (- / 0) | - (- / 0) | 0.039 (0.000 / 10) |
| <b>Pyroglutamic acid</b>    | 4.2, 2.5, 2.4, 2.0                | Quartet, Multiplet, Multiplet, Multiplet            | - (- / 0) | - (- / 0) | - (- / 0) | - (- / 0) | 0.002 (0.000 / 10) |
| <b>Tetrahydrofuran</b>      | 3.7, 1.9                          | Multiplet, Multiplet                                | - (- / 0) | - (- / 0) | - (- / 0) | - (- / 0) | 0.401 (0.000 / 10) |
| <b>Dimethylmalonic acid</b> | 1.4                               | Singlet                                             | - (- / 0) | - (- / 0) | - (- / 0) | - (- / 0) | 0.223 (0.000 / 10) |

**Table S2.** Average concentrations (mM) of select metabolites in rat feces that were processed by ultrafiltration, no extraction without baseline correction, Bligh-Dyer (BD) extraction without baseline correction, no extraction with baseline correction, and BD with baseline correction. Metabolites were identified and quantified using Chenomx, and only metabolites with a percent occurrence of 50 or higher are shown. Metabolite numbers correspond to Figure 4, and the numbers presented in brackets correspond to the standard deviation and percent occurrence of each metabolite, respectively.

| #  | Compound Name                | No Extraction     | Bligh-Dyer        | Ultra-filtration  | No Extraction BC   | Bligh-Dyer BC     |
|----|------------------------------|-------------------|-------------------|-------------------|--------------------|-------------------|
| 1  | 1,3-Dimethyluric acid        | 0.078 (0.041/100) | 0.039 (0.011/80)  | 0.080 (0.033/100) | 0.058 (0.029/100)  | 0.036 (0.014/80)  |
| 2  | 1-Methyladenosine            | 1.837 (0.645/75)  | 0.445 (0.117/70)  | 1.171 (0.639/80)  | 1.013 (0.462/75)   | 0.350 (0.139/80)  |
| 3  | 2-Isopropylmalic acid        | 0.058 (0.025/50)  | 0.019 (0.005/60)  | 0.049 (0.020/90)  | 0.026 (0.013/100)  | 0.012 (0.003/100) |
| 4  | 3-Hydroxyisovaleric acid     | 0.101 (0.034/50)  | 0.033 (0.012/90)  | 0.138 (0.061/80)  | 0.070 (0.034/75)   | 0.031 (0.012/90)  |
| 5  | 3-Hydroxymandelic acid       | 0.037 (0.010/50)  | 0.013 (0.006/80)  | 0.035 (0.006/90)  | 0.031 (0.003/100)  | 0.029 (0.058/70)  |
| 6  | 3-Hydroxymethylglutaric acid | 0.112 (0.010/75)  | 0.036 (0.012/90)  | 0.101 (0.019/90)  | 0.063 (0.014/100)  | 0.032 (0.008/90)  |
| 7  | 3-Hydroxyphenylacetic acid   | 2.543 (0.247/100) | 1.005 (0.177/70)  | 1.793 (0.436/90)  | 2.544 (0.246/50)   | 1.039 (0.159/80)  |
| 8  | 3-Methylxanthine             | 0.042 (0.010/75)  | 0.009 (0.004/80)  | 0.022 (0.009/70)  | 0.008 (0.005/100)  | 0.002 (0.001/80)  |
| 9  | 4-Pyridoxic acid             | 0.054 (0.030/75)  | 0.028 (0.009/100) | 0.055 (0.023/100) | 0.042 (0.031/100)  | 0.020 (0.014/90)  |
| 10 | 5-Hydroxyindoleacetic acid   | 0.115 (0.044/50)  | 0.030 (0.009/80)  | 0.113 (0.046/90)  | 0.110 (0.056/75)   | 0.033 (0.008/90)  |
| 11 | 7-Methylxanthine             | 11.815 (1.319/75) | 4.602 (0.774/90)  | 8.367 (1.864/90)  | 11.802 (1.312/100) | 4.652 (0.798/90)  |
| 12 | Acetic acid                  | 0.521 (0.445/100) | 0.194 (0.100/100) | 0.565 (0.306/100) | 0.531 (0.433/100)  | 0.189 (0.094/90)  |
| 13 | Allantoin                    | 0.010 (0.002/100) | 0.004 (0.001/60)  | 0.007 (0.002/100) | 0.006 (0.002/100)  | 0.008 (0.011/60)  |
| 14 | Alpha-D-Glucose              | 0.752 (0.425/75)  | 0.200 (0.109/50)  | 0.350 (0.180/90)  | 0.079 (0.038/75)   | 0.126 (0.070/70)  |
| 15 | Argininosuccinic acid        | 1.147 (0.310/50)  | 0.167 (0.057/70)  | 1.000 (0.251/60)  | 1.381 (0.319/100)  | 0.300 (0.043/90)  |
| 16 | Biotin                       | 0.186 (0.147/100) | 0.050 (0.035/100) | 0.085 (0.061/100) | 0.188 (0.171/50)   | 0.079 (0.028/90)  |
| 17 | Butyric acid                 | 0.037 (0.015/100) | 0.011 (0.004/100) | 0.034 (0.011/100) | 0.049 (0.013/100)  | 0.038 (0.013/90)  |
| 18 | Cytidine monophosphate       | 1.129 (0.188/75)  | 0.333 (0.106/50)  | 0.887 (0.210/80)  | 0.117 (0.053/50)   | 0.112 (0.059/60)  |
| 19 | D-Glucose                    | 0.080 (0.043/50)  | 0.015 (0.010/90)  | 0.046 (0.017/100) | 0.014 (0.002/100)  | 0.010 (0.008/60)  |
| 20 | D-Maltose                    | 0.028 (0.017/75)  | 0.004 (0.003/50)  | 0.011 (0.005/80)  | 0.004 (0.002/50)   | 0.003 (0.001/70)  |
| 21 | Ethanol                      | 0.634 (0.122/75)  | 0.121 (0.055/90)  | 0.239 (0.262/100) | 0.378 (0.231/75)   | 0.285 (0.211/90)  |
| 22 | Formic acid                  | 0.751 (0.254/50)  | 0.132 (0.078/80)  | 0.413 (0.166/100) | 0.142 (0.074/75)   | 0.442 (1.226/70)  |
| 23 | Galacturonic acid            | 0.147 (0.051/100) | 0.026 (0.014/100) | 0.086 (0.013/100) | 0.022 (0.001/100)  | 0.131 (0.313/90)  |
| 24 | Glucose 6-phosphate          | 0.747 (0.137/75)  | 0.236 (0.078/80)  | 1.155 (0.971/100) | 0.922 (0.775/75)   | 0.227 (0.115/50)  |
| 25 | Glycine                      | 3.848 (1.948/50)  | 1.324 (0.467/90)  | 2.551 (1.217/90)  | 3.734 (2.067/75)   | 1.305 (0.457/90)  |

|    |                            |                   |                   |                   |                   |                   |
|----|----------------------------|-------------------|-------------------|-------------------|-------------------|-------------------|
| 26 | Homoveratric acid          | 0.033 (0.005/100) | 0.007 (0.001/50)  | 0.022 (0.012/80)  | 0.016 (0.007/50)  | 0.007 (0.001/100) |
| 27 | Hydrocinnamic acid         | 0.166 (0.027/100) | 0.068 (0.024/90)  | 0.094 (0.058/90)  | 0.132 (0.022/100) | 0.035 (0.023/90)  |
| 28 | Hydroxyacetone             | 5.395 (1.241/100) | 1.411 (0.457/90)  | 5.416 (0.907/80)  | 2.046 (1.035/75)  | 0.691 (0.397/90)  |
| 29 | Isovalerylglycine          | 0.036 (0.018/50)  | 0.004 (0.002/60)  | 0.012 (0.013/80)  | 0.004 (0.001/75)  | 0.004 (0.002/60)  |
| 30 | L-Alanine                  | 0.320 (0.116/75)  | 0.045 (0.014/100) | 0.213 (0.069/100) | 0.108 (0.067/100) | 0.048 (0.012/90)  |
| 31 | L-Arabinose                | 0.448 (0.015/100) | 0.086 (0.033/50)  | 0.372 (0.077/90)  | 0.334 (0.058/50)  | 0.097 (0.047/50)  |
| 32 | L-Phenylalanine            | 6.985 (2.362/100) | 0.460 (0.288/70)  | 0.576 (0.638/100) | 2.502 (0.997/100) | 0.719 (0.405/70)  |
| 33 | L-Valine                   | 0.325 (0.184/100) | 0.124 (0.040/100) | 0.176 (0.126/90)  | 0.279 (0.140/100) | 0.153 (0.065/100) |
| 34 | Malic acid                 | 0.179 (0.043/100) | 0.019 (0.008/100) | 0.124 (0.056/100) | 0.159 (0.047/100) | 0.023 (0.013/100) |
| 35 | Methyl isobutyl ketone     | 0.072 (0.059/100) | 0.074 (0.019/70)  | 0.156 (0.041/100) | 0.157 (0.050/100) | 0.038 (0.026/50)  |
| 36 | Methylimidazoleacetic acid | 0.214 (0.115/100) | 0.154 (0.076/100) | 0.199 (0.083/100) | 0.211 (0.117/100) | 0.165 (0.072/90)  |
| 37 | N-Acetyl-L-methionine      | 0.441 (0.090/100) | 0.113 (0.058/70)  | 0.329 (0.132/60)  | 0.227 (0.062/100) | 0.074 (0.030/100) |
| 38 | N-Acetylneuraminic acid    | 0.106 (0.069/100) | 0.073 (0.039/100) | 0.091 (0.053/100) | 0.076 (0.038/100) | 0.062 (0.019/100) |
| 39 | N-Formyl-L-methionine      | 1.099 (0.181/75)  | 0.343 (0.141/50)  | 0.979 (0.191/100) | 0.351 (0.189/100) | 0.236 (0.063/70)  |
| 40 | Nicotinic acid             | 0.181 (0.053/100) | 0.038 (0.010/80)  | 0.118 (0.041/100) | 0.116 (0.011/100) | 0.035 (0.009/70)  |
| 41 | Pantothenic acid           | 0.091 (0.016/100) | 0.035 (0.011/100) | 0.074 (0.013/100) | 0.076 (0.017/100) | 0.037 (0.010/100) |
| 42 | Phenylacetic acid          | 0.099 (0.030/50)  | 0.024 (0.010/80)  | 0.045 (0.021/80)  | 0.053 (0.001/75)  | 0.024 (0.007/90)  |
| 43 | Propionic acid             | 0.158 (0.077/100) | 0.015 (0.005/100) | 0.058 (0.037/100) | 0.020 (0.003/100) | 0.037 (0.022/90)  |
| 44 | Raffinose                  | 0.338 (0.152/75)  | 0.159 (0.054/80)  | 0.477 (0.166/70)  | 0.340 (0.134/100) | 0.168 (0.052/90)  |
| 45 | Riboflavin                 | 0.220 (0.064/100) | 0.050 (0.011/100) | 0.164 (0.028/100) | 0.663 (0.132/100) | 0.147 (0.053/90)  |
| 46 | Sebacic acid               | 0.028 (0.001/100) | 0.088 (0.027/90)  | 0.034 (0.017/100) | 0.026 (0.004/75)  | 0.091 (0.026/80)  |
| 47 | Succinic acid              | 0.264 (0.166/100) | 0.094 (0.030/100) | 0.163 (0.128/100) | 0.081 (0.016/100) | 0.054 (0.008/90)  |
| 48 | Sumiki's acid              | 0.399 (0.157/75)  | 0.160 (0.027/80)  | 0.331 (0.090/80)  | 0.402 (0.153/50)  | 0.164 (0.026/50)  |
| 49 | Thiamine                   | 0.151 (0.083/75)  | 0.034 (0.018/70)  | 0.094 (0.030/70)  | 0.173 (0.058/75)  | 0.060 (0.021/60)  |
| 50 | Undecanedioic acid         | 4.792 (2.549/100) | 1.785 (1.351/100) | 4.081 (1.655/100) | 0.396 (0.097/100) | 0.357 (0.243/80)  |
| 51 | Urocanic acid              | 0.016 (0.003/100) | 0.012 (0.002/70)  | 0.021 (0.004/90)  | 0.022 (0.008/75)  | 0.014 (0.004/60)  |
| 52 | Xanthine                   | 0.121 (0.107/75)  | 0.057 (0.030/100) | 0.197 (0.155/100) | 0.330 (0.073/100) | 0.065 (0.014/90)  |

**Table S3.** Average concentrations (mM) of all metabolites identified in chicken feces that were processed by ultrafiltration (UF), no extraction without baseline correction, Bligh-Dyer (BD) extraction without baseline correction, no extraction with baseline correction (BC), and BD with BC. Metabolites were identified and quantified using Chenomx. Metabolite numbers correspond to Supplemental Figure S4, and the numbers presented in brackets correspond to the standard deviation and percent occurrence of each metabolite, respectively.

| # | Compound Name     | Chemical shift (ppm) | Multiplicity                           | No Extraction av mM (STD / % occur.) | BD av mM (STD / % occur.) | UF av mM (STD / % occur.) | No Extraction BC av mM (STD % occur.) | BD BC av mM (STD / % occur.) |
|---|-------------------|----------------------|----------------------------------------|--------------------------------------|---------------------------|---------------------------|---------------------------------------|------------------------------|
| 1 | 2-Hydroxybutyrate | 4.0, 1.7, 1.6, 0.9   | Quartet, Multiplet, Multiplet, Triplet | 0.121 (0.051 / 75)                   | 0.051 (0.022 / 75)        | 0.059 (0.028 / 75)        | - (- / 0)                             | 0.037 (0.007 / 50)           |
| 2 | Acetate           | 1.9                  | Singlet                                | 2.046 (0.647 / 100)                  | 1.124 (0.492 / 100)       | 0.864 (0.322 / 87.5)      | 2.045 (0.648 / 100)                   | 1.124 (0.491 / 100)          |
| 3 | Alanine           | 3.8, 1.5             | Quartet, Doublet                       | 0.134 (0.055 / 100)                  | 0.070 (0.026 / 100)       | 0.059 (0.019 / 87.5)      | 0.134 (0.055 / 100)                   | 0.070 (0.026 / 100)          |
| 4 | Aspartate         | 3.9, 2.8, 2.7        | Quartet, Doublet, Doublet              | 0.105 (0.050 / 50)                   | 0.034 (0.012 / 50)        | 0.044 (0.011 / 87.5)      | 0.072 (0.023 / 62.5)                  | 0.034 (0.012 / 50)           |
| 5 | Betaine           | 3.9, 3.3             | Singlet, Singlet                       | 0.117 (0.047 / 87.5)                 | 0.092 (0.058 / 100)       | 0.076 (0.056 / 87.5)      | 0.132 (0.120 / 100)                   | 0.092 (0.058 / 100)          |
| 6 | Butyrate          | 2.1, 1.5, 0.9        | Triplet, Multiplet, Triplet            | 0.117 (0.123 / 50)                   | 0.083 (0.095 / 87.5)      | 0.033 (0.015 / 37.5)      | 0.154 (0.090 / 100)                   | 0.092 (0.087 / 100)          |
| 7 | Choline           | 4.1, 3.5, 3.2        | Multiplet, Multiplet, Singlet          | 0.140 (0.096 / 100)                  | 0.127 (0.040 / 100)       | 0.076 (0.040 / 87.5)      | 0.139 (0.096 / 100)                   | 0.127 (0.040 / 100)          |
| 8 | Citrate           | 2.7, 2.5             | Doublet, Doublet                       | 0.017 (0.000 / 12.5)                 | - (- / 0)                 | - (- / 0)                 | 0.021 (0.007 / 37.5)                  | 0.008 (0.000 / 12.5)         |

|    |                     |                                                                                          |                                                                                                                                                                   |                      |                      |                      |                      |                      |
|----|---------------------|------------------------------------------------------------------------------------------|-------------------------------------------------------------------------------------------------------------------------------------------------------------------|----------------------|----------------------|----------------------|----------------------|----------------------|
| 9  | Creatine            | 3.9, 3.0                                                                                 | Singlet, Singlet                                                                                                                                                  | 0.097 (0.125 / 75)   | 0.129 (0.110 / 100)  | 0.067 (0.059 / 75)   | 0.109 (0.120 / 100)  | 0.130 (0.107 / 100)  |
| 10 | Creatinine          | 4.0, 3.0                                                                                 | Singlet, Singlet                                                                                                                                                  | 0.166 (0.070 / 100)  | 0.035 (0.016 / 100)  | 0.074 (0.037 / 87.5) | 0.117 (0.073 / 100)  | 0.034 (0.023 / 100)  |
| 11 | Dimethylamine       | 2.7                                                                                      | Singlet                                                                                                                                                           | 0.066 (0.032 / 100)  | 0.009 (0.004 / 25)   | 0.043 (0.017 / 87.5) | 0.054 (0.039 / 100)  | 0.007 (0.004 / 75)   |
| 12 | Formate             | 8.4                                                                                      | Singlet                                                                                                                                                           | 0.560 (0.187 / 100)  | 0.309 (0.115 / 100)  | 0.295 (0.081 / 87.5) | 0.560 (0.187 / 100)  | 0.309 (0.115 / 100)  |
| 13 | Galactose           | 5.3, 4.6, 4.1, 4.0, 3.9, 3.9, 3.8, 3.8, 3.7, 3.7, 3.7, 3.6, 3.5                          | Doublet, Doublet, Triplet, Doublet, Doublet, Doublet, Doublet, Quartet, Doublet, Doublet, Doublet, Quartet, Doublet, Quartet                                      | 0.288 (0.221 / 37.5) | 0.050 (0.028 / 50)   | 0.088 (0.034 / 87.5) | 0.331 (0.000 / 12.5) | 0.230 (0.043 / 50)   |
| 14 | Glucose             | 5.2, 4.6, 3.9, 3.8, 3.8, 3.8, 3.7, 3.7, 3.5, 3.5, 3.5, 3.4, 3.4, 3.2                     | Doublet, Doublet, Doublet, Doublet, Multiplet, Doublet, Doublet, Triplet, Doublet, Triplet, Multiplet, Triplet, Triplet, Quartet                                  | 0.371 (0.176 / 87.5) | 0.059 (0.040 / 87.5) | 0.333 (0.136 / 87.5) | 0.370 (0.117 / 62.5) | 0.125 (0.067 / 62.5) |
| 15 | Glutamate           | 3.8, 2.4, 2.3, 2.1, 2.0                                                                  | Quartet, Multiplet, Multiplet, Multiplet, Multiplet, Multiplet                                                                                                    | - (- / 0)            | 0.160 (0.095 / 25)   | - (- / 0)            | - (- / 0)            | 0.146 (0.057 / 50)   |
| 16 | Glycine             | 3.6                                                                                      | Singlet                                                                                                                                                           | 0.080 (0.000 / 12.5) | 0.050 (0.023 / 100)  | 0.112 (0.045 / 75)   | 0.080 (0.000 / 12.5) | 0.050 (0.023 / 100)  |
| 17 | Isoleucine          | 3.7, 2.0, 1.5, 1.2, 1.0, 0.9                                                             | Doublet, Multiplet, Multiplet, Multiplet, Doublet, Triplet                                                                                                        | 0.080 (0.033 / 100)  | 0.033 (0.013 / 100)  | 0.031 (0.011 / 87.5) | 0.080 (0.033 / 100)  | 0.032 (0.011 / 75)   |
| 18 | Lactate             | 4.1, 1.3                                                                                 | Quartet, Doublet                                                                                                                                                  | 0.185 (0.000 / 12.5) | 0.169 (0.050 / 62.5) | 0.117 (0.000 / 12.5) | 0.175 (0.000 / 12.5) | 0.135 (0.061 / 100)  |
| 19 | Lysine              | 3.8, 3.0, 1.9, 1.9, 1.7, 1.5, 1.4                                                        | Triplet, Triplet, Multiplet, Multiplet, Multiplet, Multiplet, Multiplet                                                                                           | 0.191 (0.000 / 12.5) | 0.032 (0.000 / 12.5) | 0.074 (0.000 / 12.5) | 0.114 (0.033 / 37.5) | 0.049 (0.015 / 25)   |
| 20 | Methionine          | 3.9, 2.6, 2.2, 2.1, 2.1                                                                  | Quartet, Triplet, Multiplet, Singlet, Multiplet                                                                                                                   | 0.026 (0.011 / 50)   | 0.009 (0.006 / 37.5) | 0.014 (0.006 / 75)   | 0.015 (0.006 / 75)   | 0.008 (0.004 / 100)  |
| 21 | Methylamine         | 2.6                                                                                      | Singlet                                                                                                                                                           | 0.012 (0.000 / 12.5) | - (- / 0)            | 0.007 (0.002 / 62.5) | 0.004 (0.004 / 100)  | 0.001 (0.000 / 12.5) |
| 22 | N-Acetylglucosamine | 8.2, 8.1, 5.2, 4.7, 3.9, 3.9, 3.8, 3.8, 3.8, 3.8, 3.7, 3.7, 3.5, 3.5, 3.5, 3.4, 2.0, 2.0 | Doublet, Doublet, Doublet, Doublet, Multiplet, Multiplet, Doublet, Doublet, Multiplet, Multiplet, Quartet, Triplet, Triplet, Multiplet, Triplet, Singlet, Singlet | 0.145 (0.066 / 100)  | 0.056 (0.012 / 62.5) | 0.054 (0.027 / 87.5) | 0.106 (0.047 / 100)  | 0.046 (0.014 / 75)   |
| 23 | N-Acetyltyrosine    | 7.7, 7.2, 6.8, 4.4, 3.1, 2.8, 1.9                                                        | Doublet, Doublet, Doublet, Multiplet, Quartet, Quartet, Singlet                                                                                                   | 0.019 (0.006 / 37.5) | 0.015 (0.005 / 87.5) | 0.015 (0.002 / 25)   | 0.015 (0.007 / 100)  | 0.013 (0.005 / 87.5) |
| 24 | Phenylalanine       | 7.4, 7.4, 7.3, 4.0, 3.3, 3.1                                                             | Triplet, Triplet, Doublet, Quartet, Quartet, Quartet                                                                                                              | 0.084 (0.026 / 100)  | 0.040 (0.012 / 62.5) | 0.039 (0.009 / 87.5) | 0.079 (0.026 / 100)  | 0.040 (0.012 / 62.5) |
| 25 | Propionate          | 2.2, 1.0                                                                                 | Quartet, Triplet                                                                                                                                                  | 0.071 (0.000 / 12.5) | 0.030 (0.017 / 25)   | 0.024 (0.000 / 12.5) | 0.037 (0.025 / 50)   | 0.017 (0.007 / 50)   |

|    |                        |                                              |                                                                                 |                      |                      |                      |                      |                      |
|----|------------------------|----------------------------------------------|---------------------------------------------------------------------------------|----------------------|----------------------|----------------------|----------------------|----------------------|
| 26 | Succinate              | 2.4                                          | Singlet                                                                         | 0.020 (0.009 / 87.5) | 0.013 (0.005 / 100)  | 0.008 (0.002 / 87.5) | 0.018 (0.009 / 100)  | 0.013 (0.005 / 100)  |
| 27 | Threonine              | 4.2, 3.6, 1.3                                | Multiplet, Doublet, Doublet                                                     | 0.226 (0.120 / 75)   | 0.067 (0.043 / 100)  | 0.106 (0.063 / 87.5) | 0.218 (0.119 / 75)   | 0.044 (0.035 / 100)  |
| 28 | Trigonelline           | 9.1, 8.8, 8.8, 8.1, 4.4                      | Singlet, Doublet, Doublet, Triplet, Singlet                                     | 0.032 (0.015 / 100)  | 0.021 (0.007 / 87.5) | 0.016 (0.007 / 87.5) | 0.027 (0.014 / 100)  | 0.020 (0.007 / 87.5) |
| 29 | Trimethylamine N-oxide | 3.3                                          | Singlet                                                                         | 0.167 (0.154 / 37.5) | 0.021 (0.018 / 50)   | 0.011 (0.006 / 75)   | 0.125 (0.139 / 62.5) | 0.013 (0.016 / 87.5) |
| 30 | Tryptophan             | 10.2, 7.7, 7.5, 7.3, 7.3, 7.2, 4.1, 3.5, 3.3 | Singlet, Doublet, Doublet, Singlet, Triplet, Triplet, Quartet, Quartet, Quartet | 0.019 (0.006 / 87.5) | 0.012 (0.003 / 87.5) | 0.013 (0.004 / 75)   | 0.018 (0.005 / 87.5) | 0.013 (0.004 / 100)  |
| 31 | Tyrosine               | 7.2, 6.9, 3.9, 3.2, 3.0                      | Doublet, Doublet, Quartet, Quartet, Quartet                                     | 0.085 (0.024 / 50)   | 0.039 (0.014 / 75)   | 0.040 (0.010 / 62.5) | 0.082 (0.024 / 62.5) | 0.041 (0.012 / 62.5) |
| 32 | Valerate               | 2.1, 1.5, 1.3, 0.9                           | Triplet, Multiplet, Multiplet, Triplet                                          | - (- / 0)            | - (- / 0)            | - (- / 0)            | - (- / 0)            | 0.042 (0.000 / 12.5) |
| 33 | Valine                 | 3.6, 2.3, 1.0, 1.0                           | Doublet, Multiplet, Doublet, Doublet                                            | 0.107 (0.048 / 100)  | 0.046 (0.018 / 100)  | 0.039 (0.014 / 87.5) | 0.107 (0.048 / 100)  | 0.047 (0.019 / 100)  |
